# Supplementary material for: Diversity of Phylogenetic Information According to the Locus and the Taxonomic Level: An Example from a Parasitic Mesostigmatid Mite Genus
Source: MDPI journal article supplement (doi:10.3390/ijms11041704), 2010-04-13

## Appendix 5

**The different topologies obtained at the specific level within *Dermanyssus* in multi-gene analyses and in multi-isolate analyses.**

A triangle followed by *D. gallinae* + *D. gallinae* L1 represents a *D. gallinae* clade from within which the clade of L1 isolates is branching.

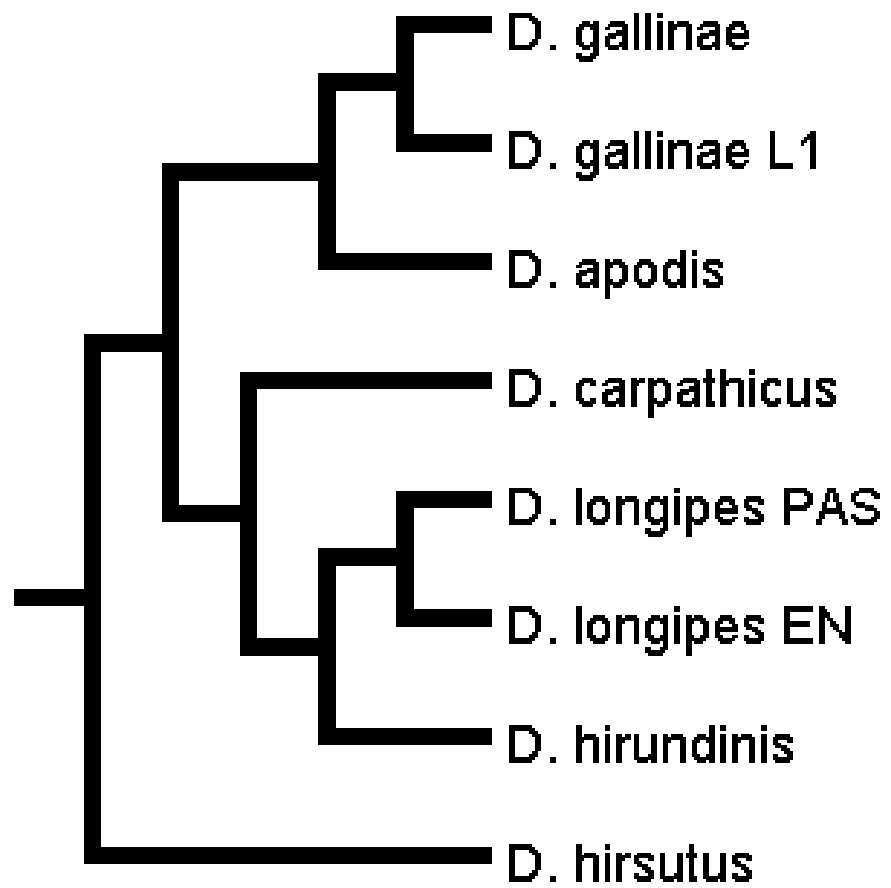

Top2

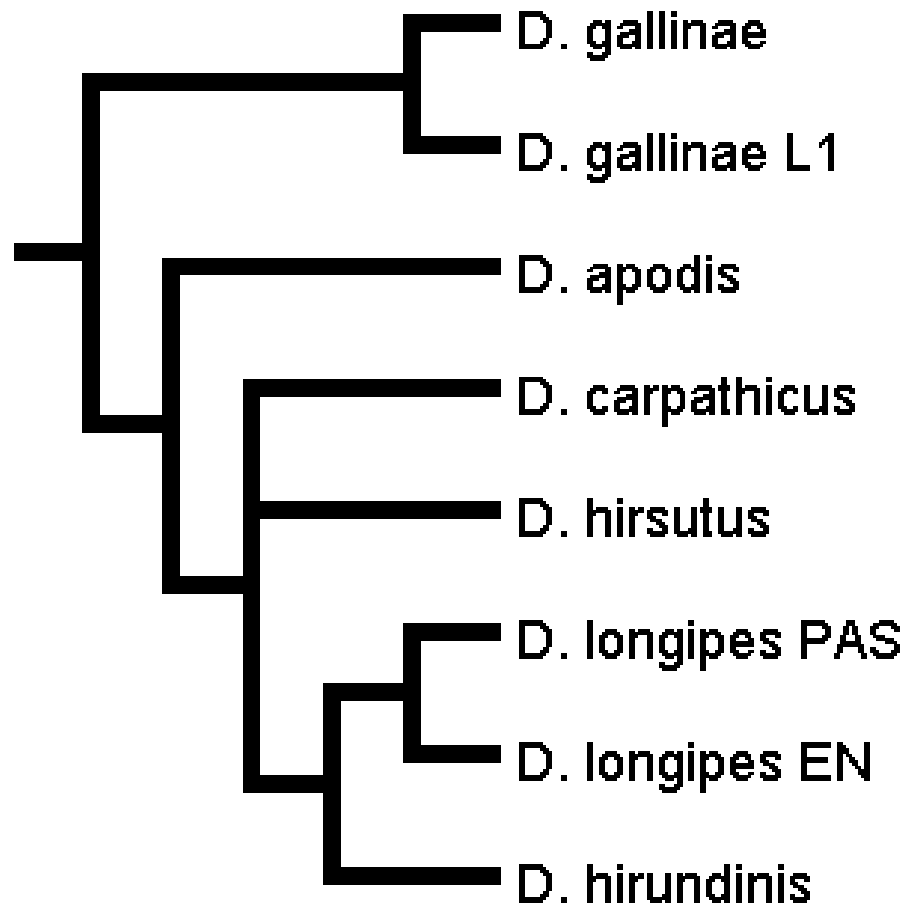

Top5

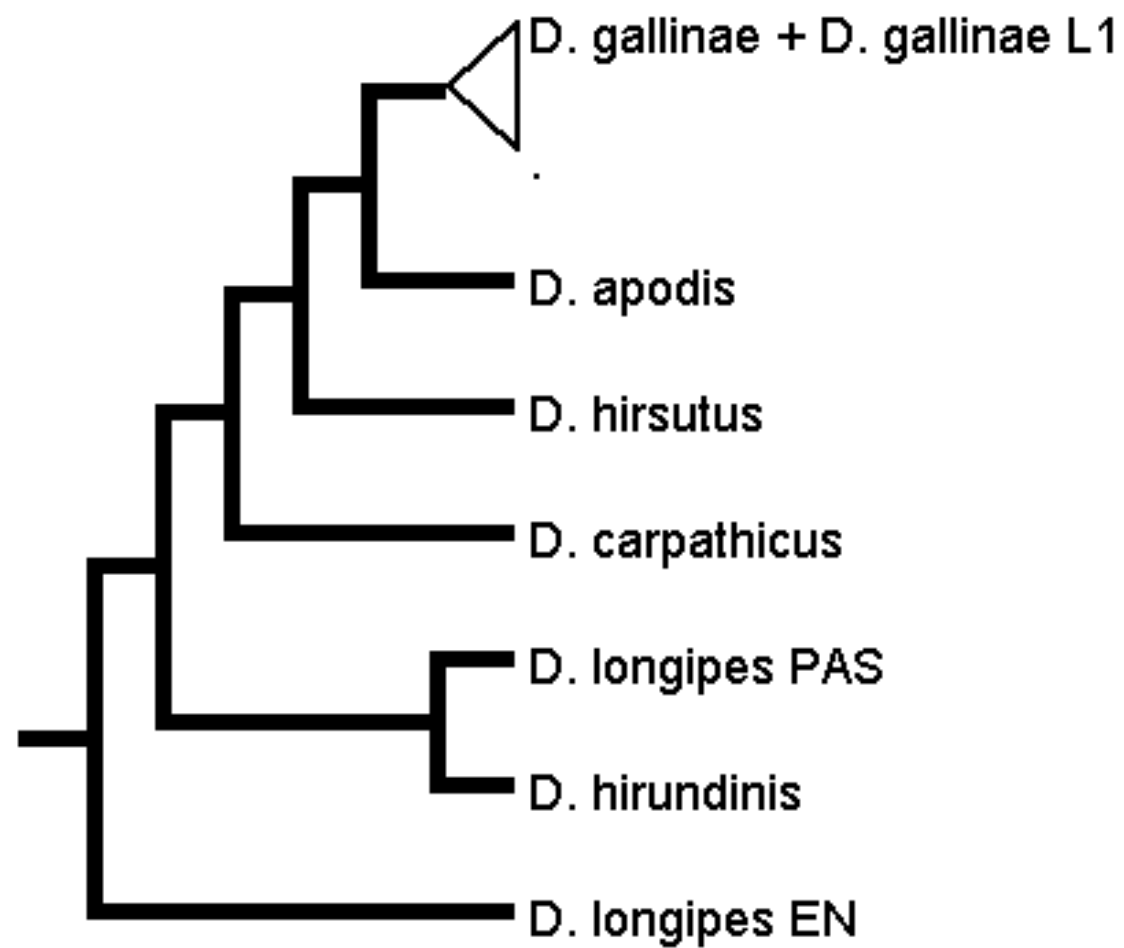

Top6

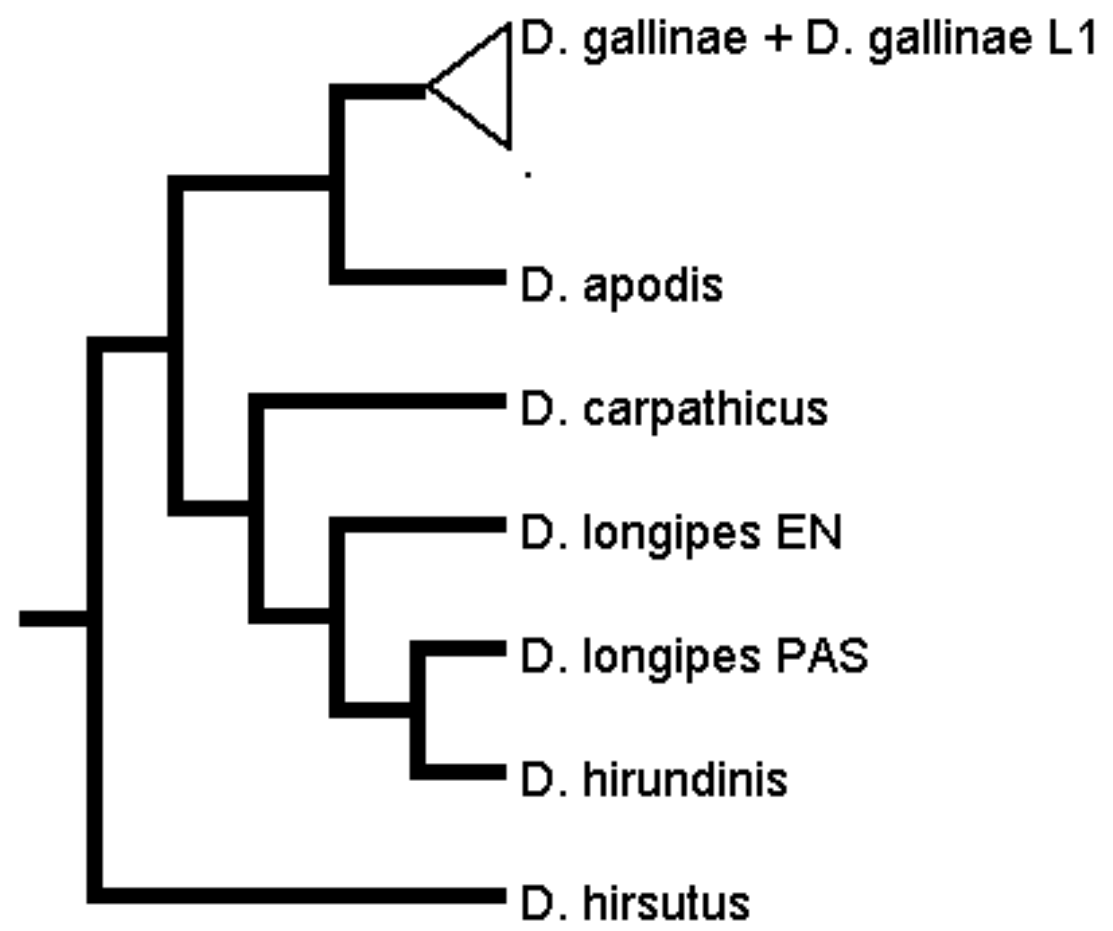

Top7

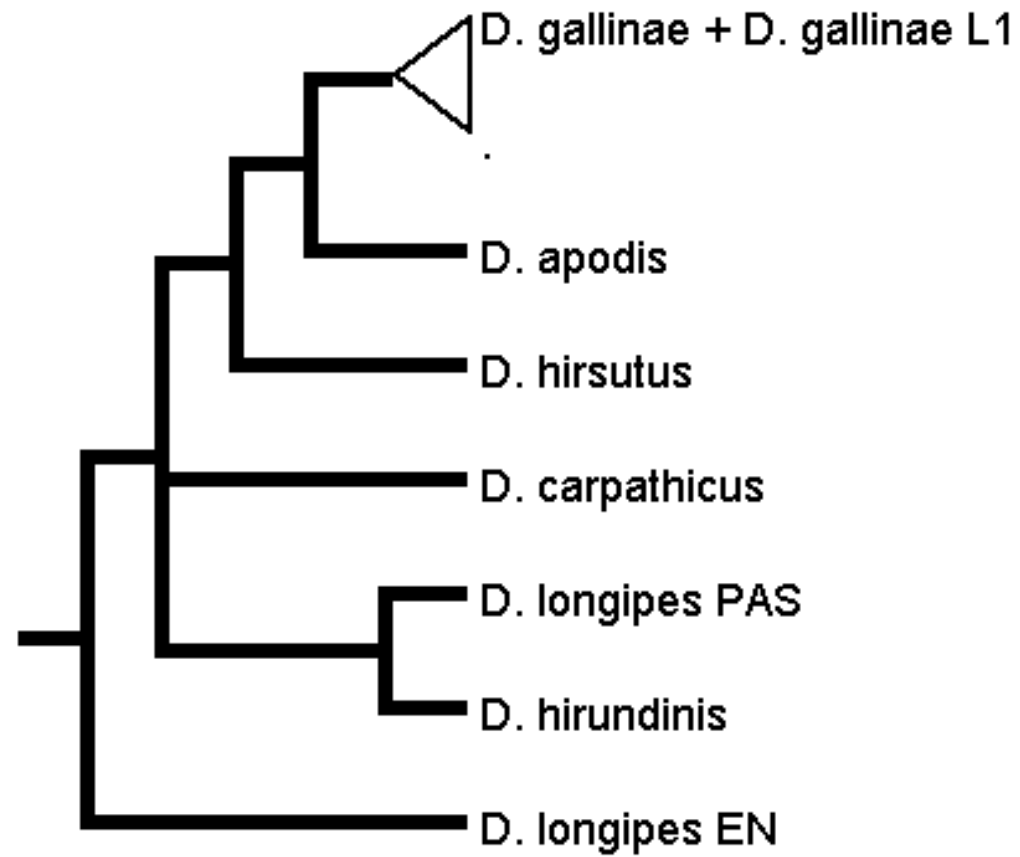

Top8

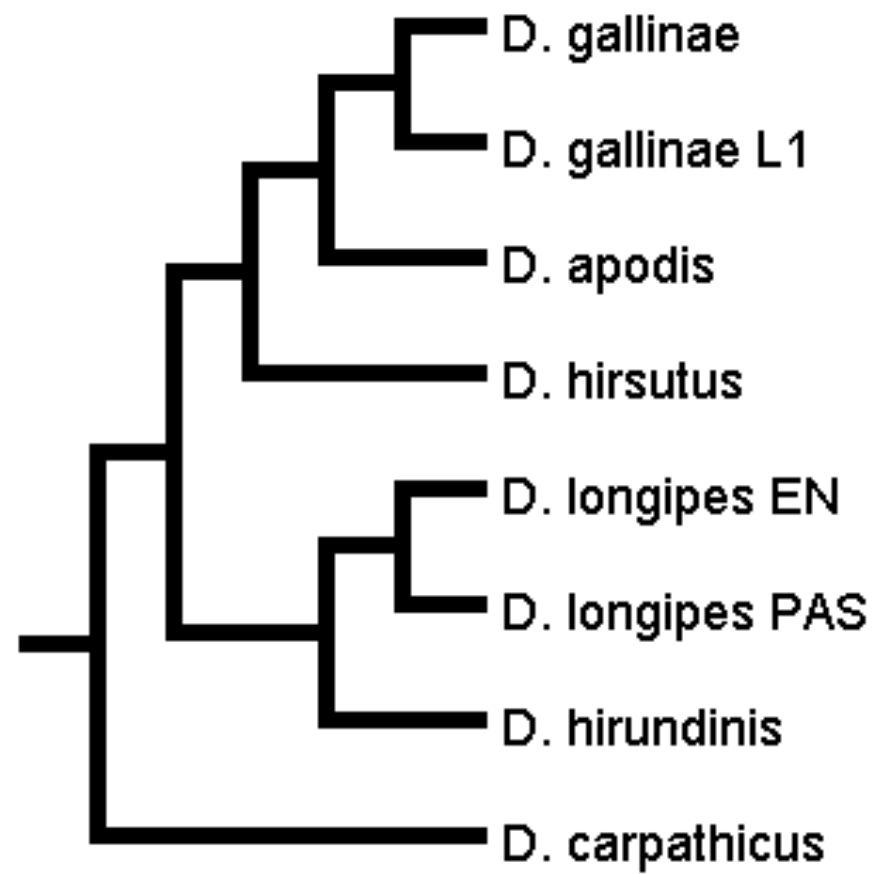

Top9

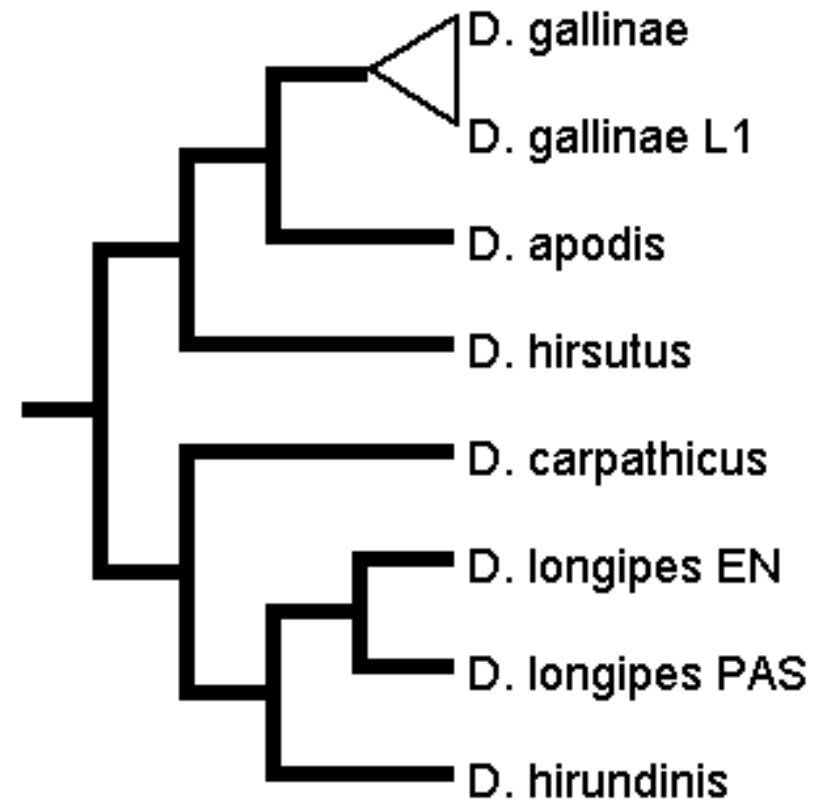

Top10



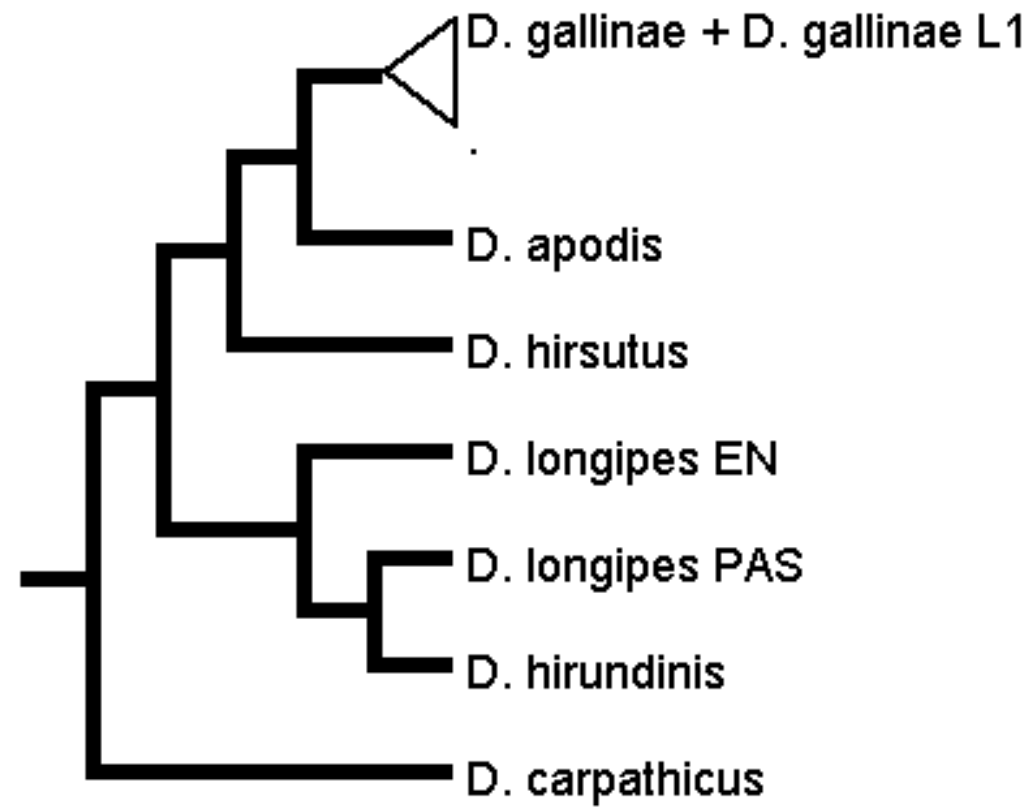

Top11

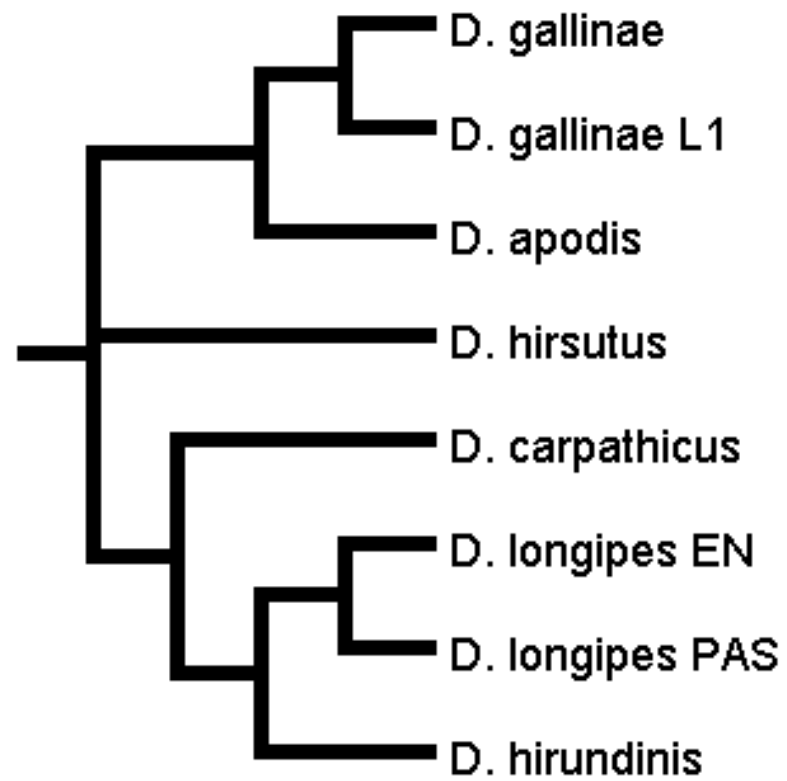

Top12

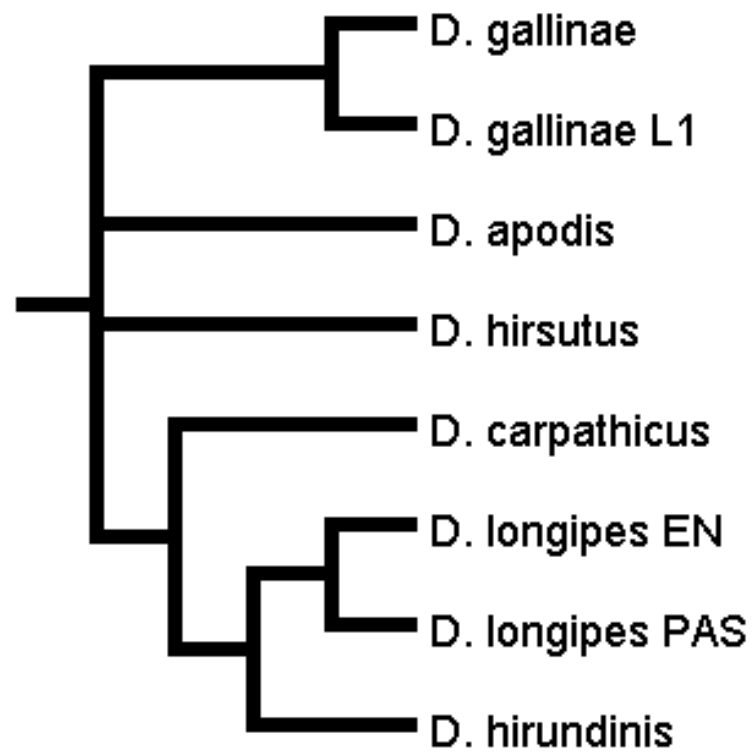

Top13

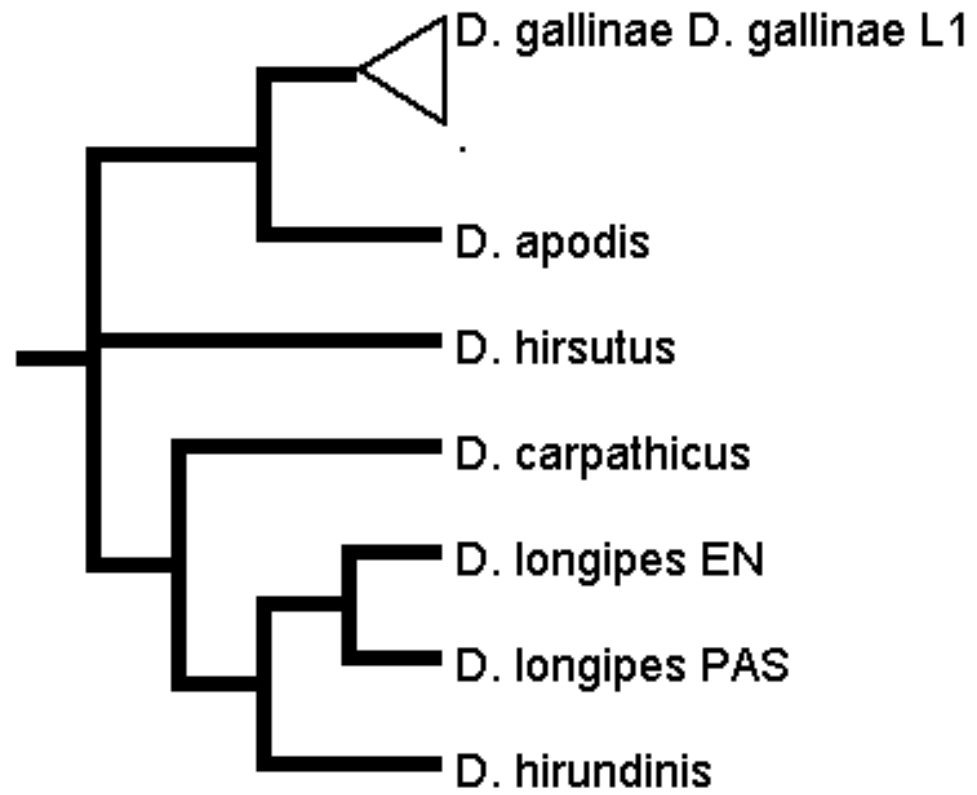

Top15

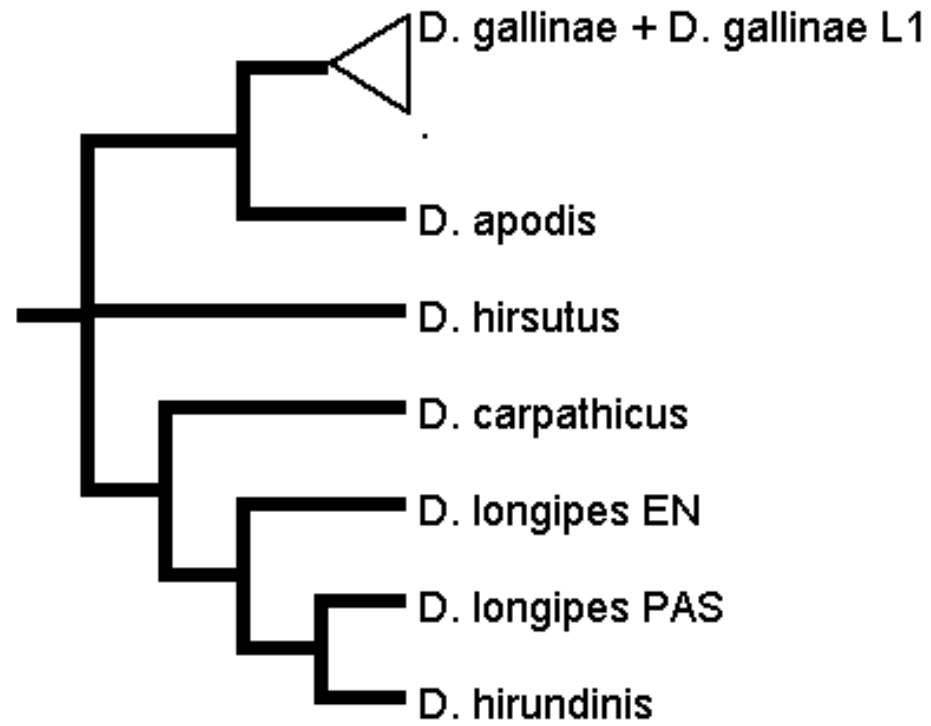

Top16

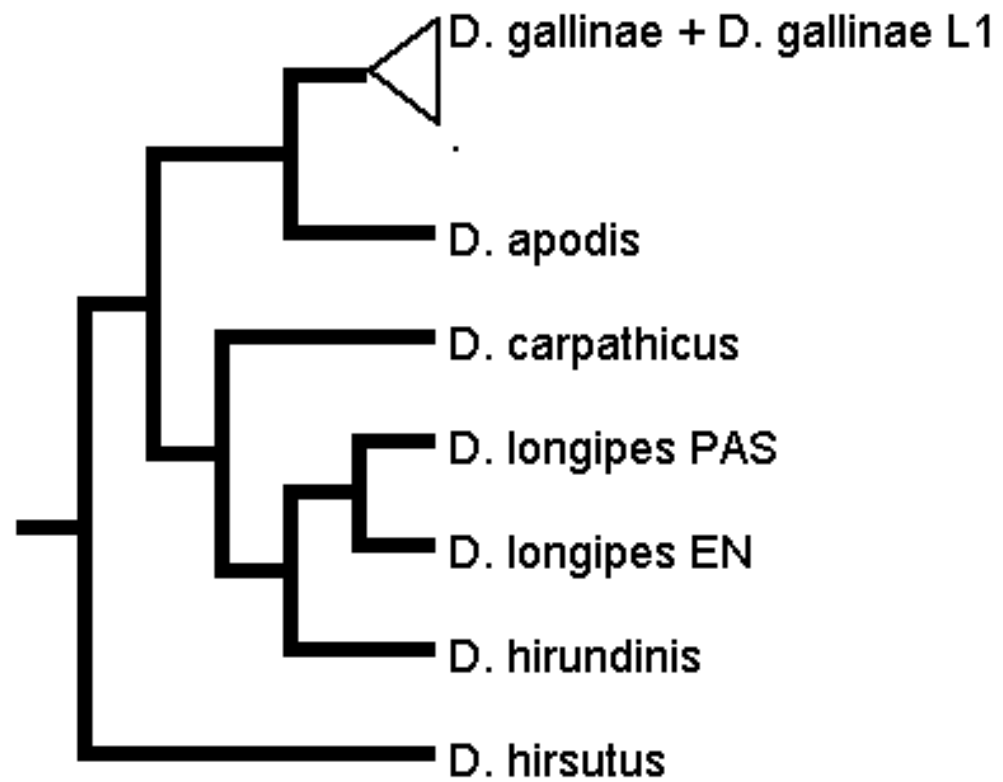

Top17

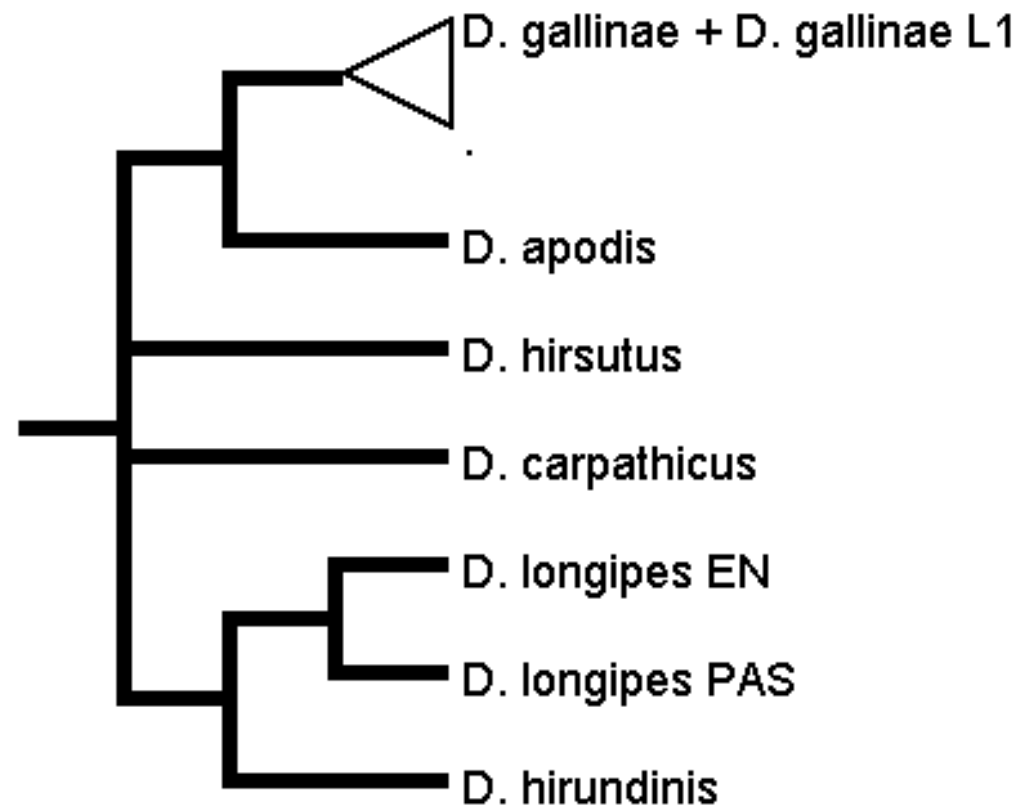

Top18

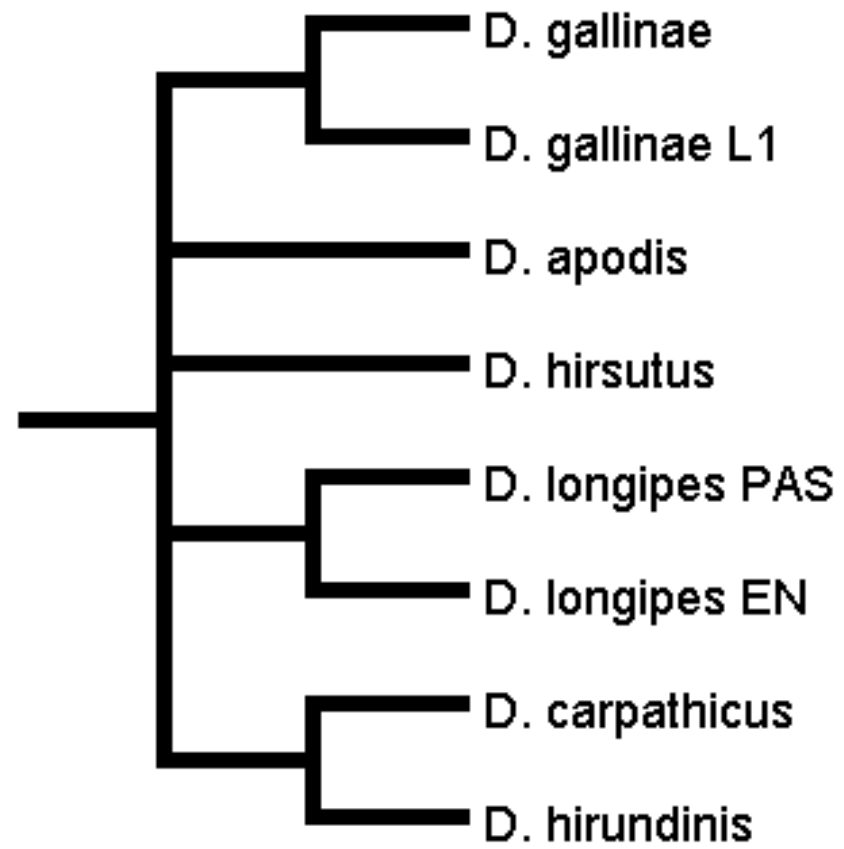

Top19



Top20

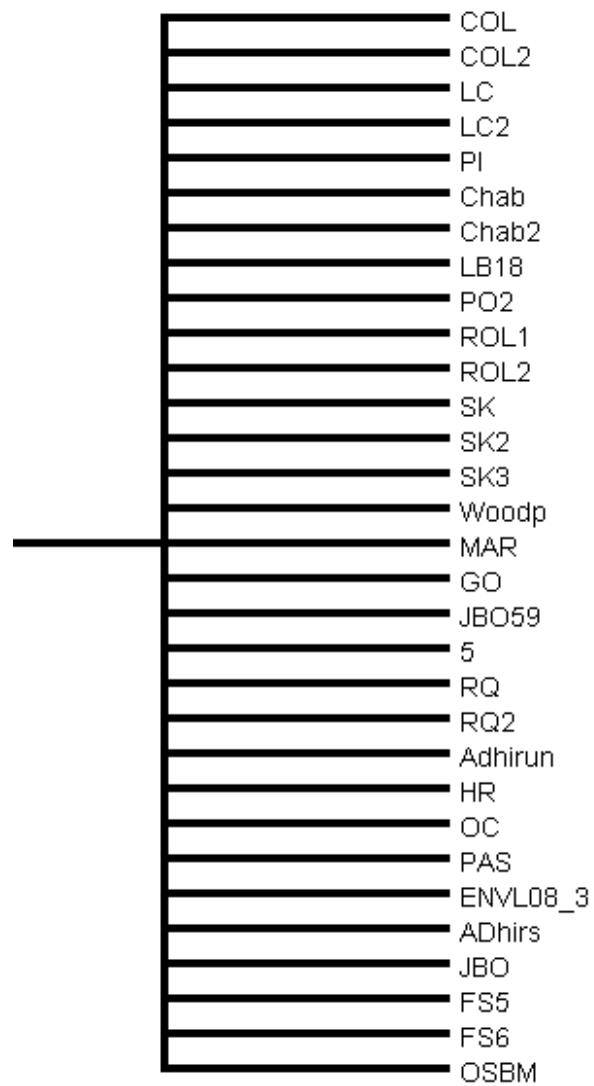

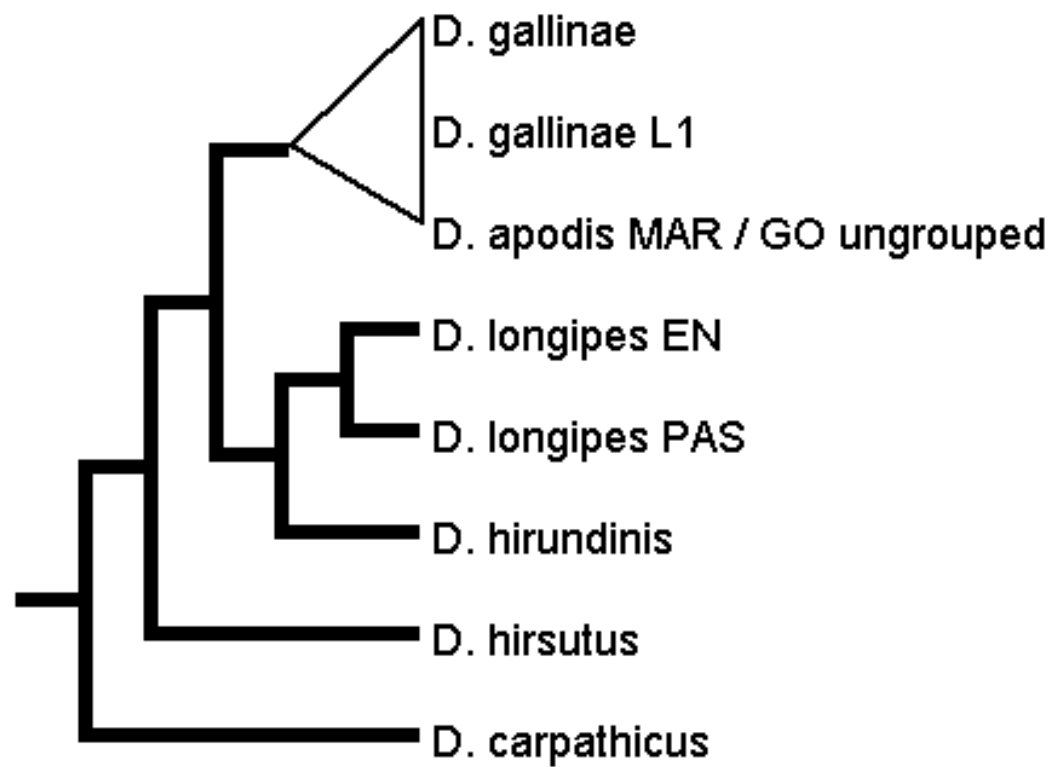

Top21

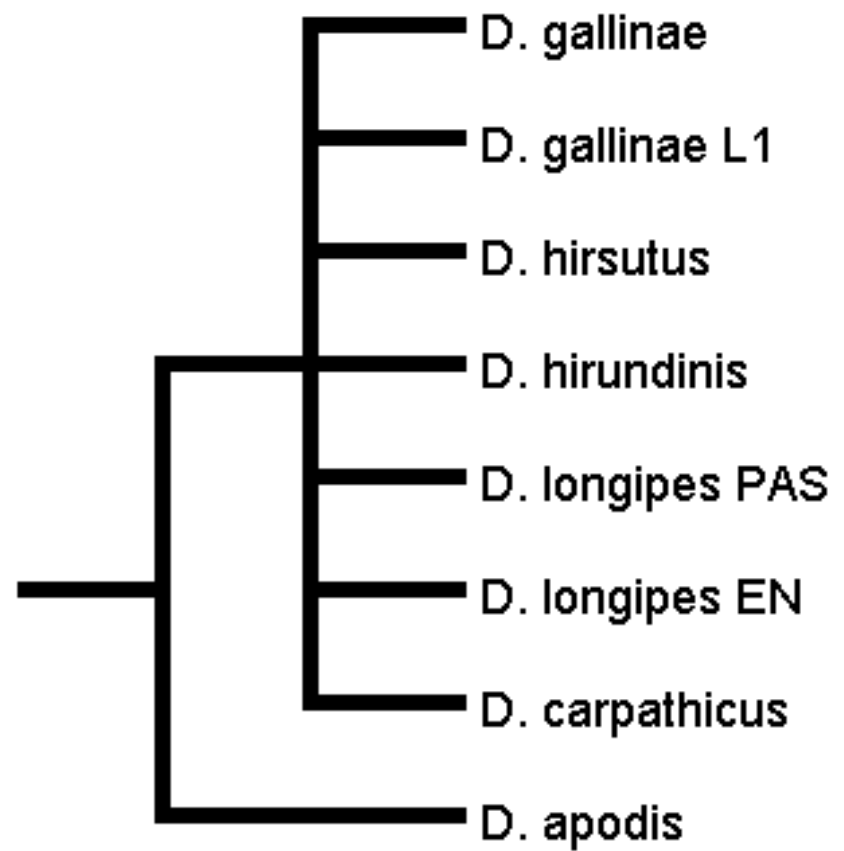

Top22

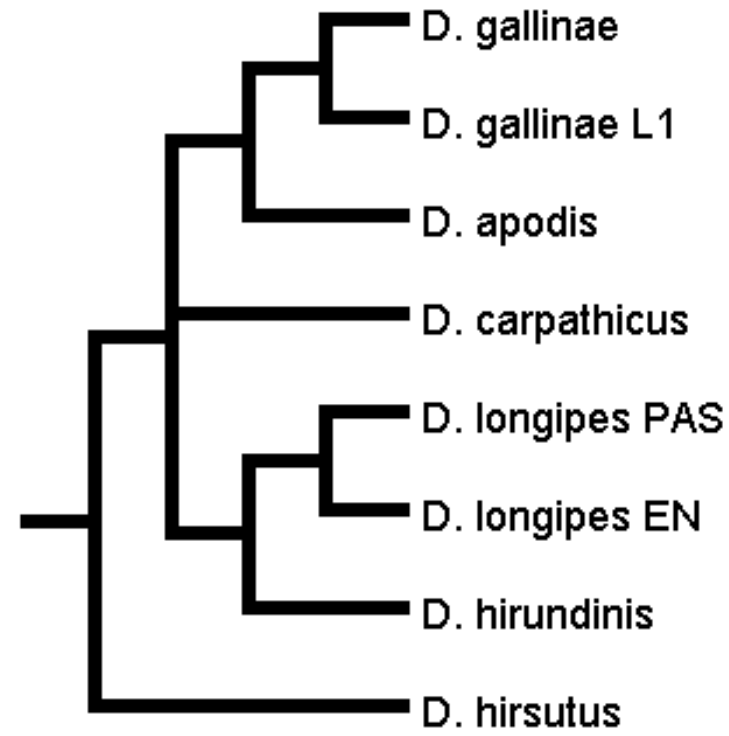

Top23

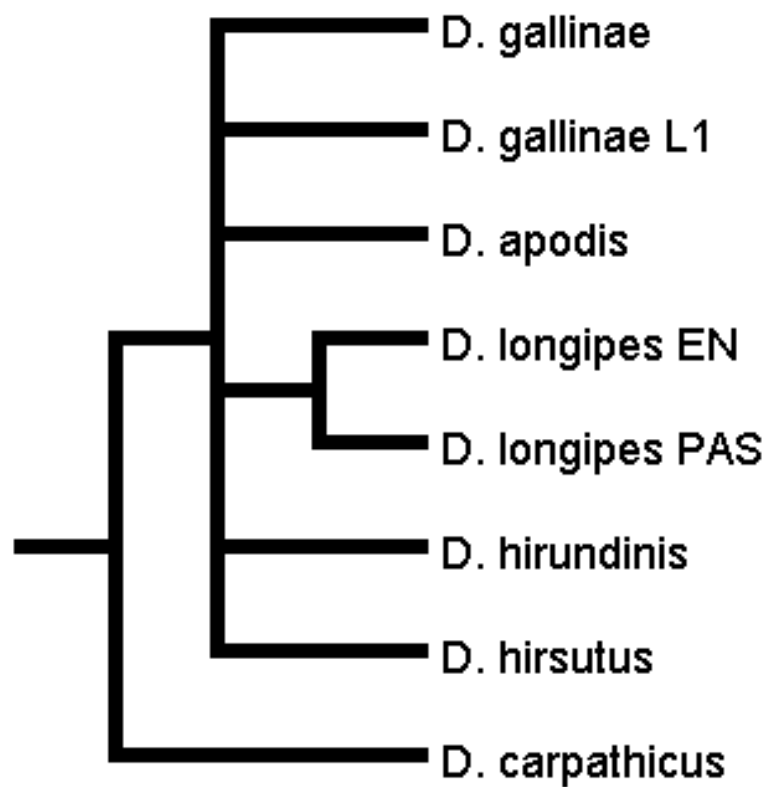

Top24

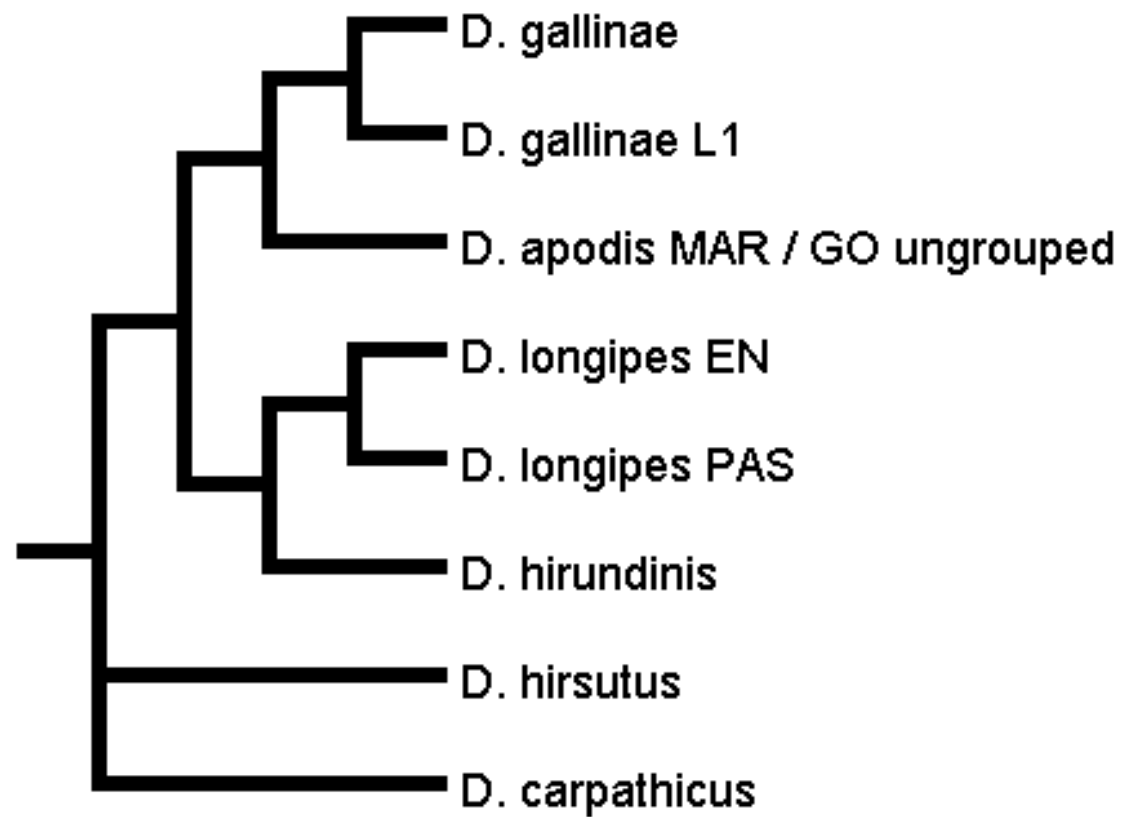

Top25

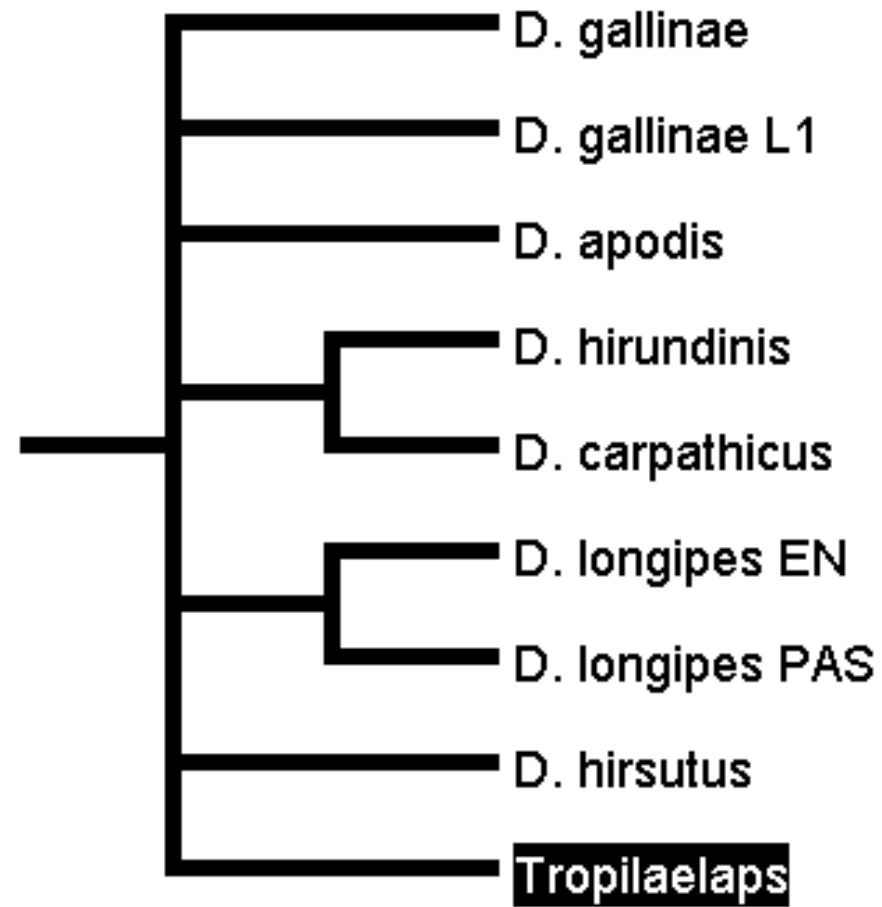

Top26

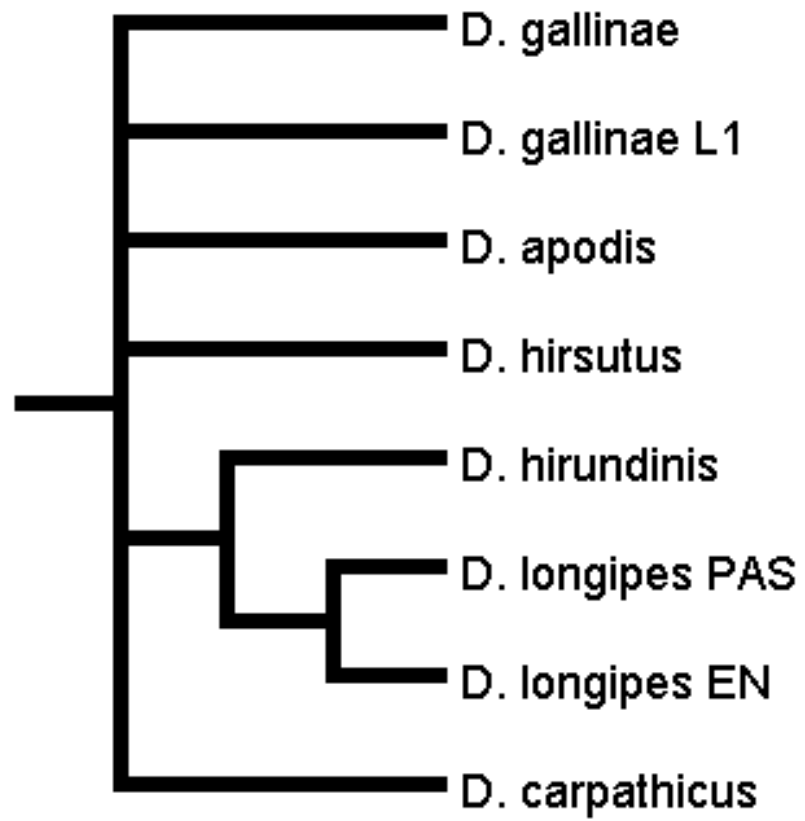

Top27



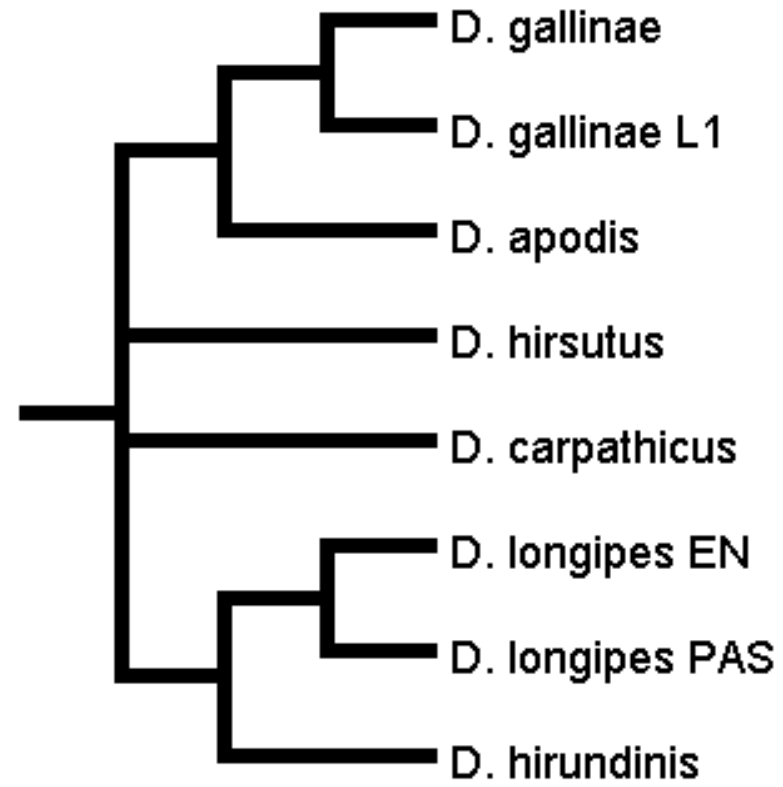

Top28

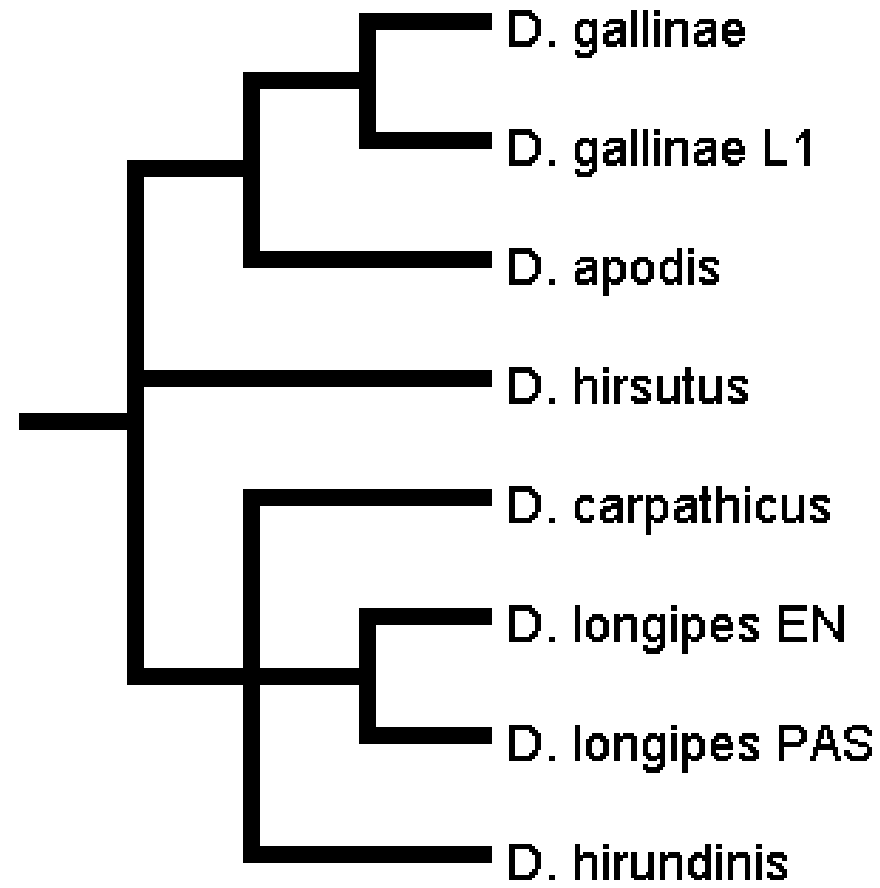

Top29

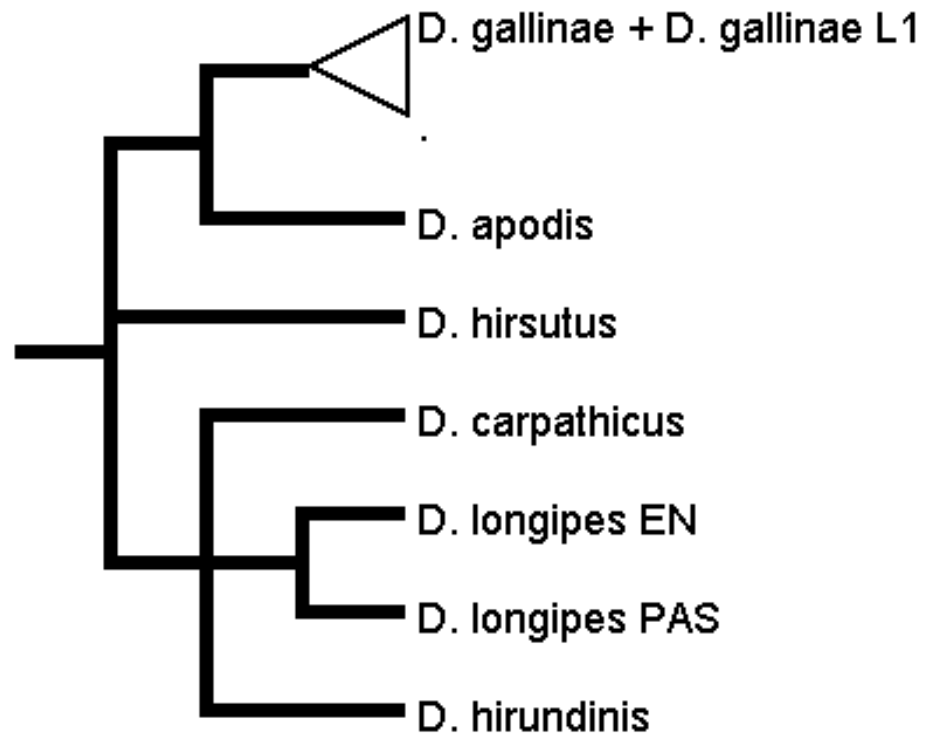

Top31

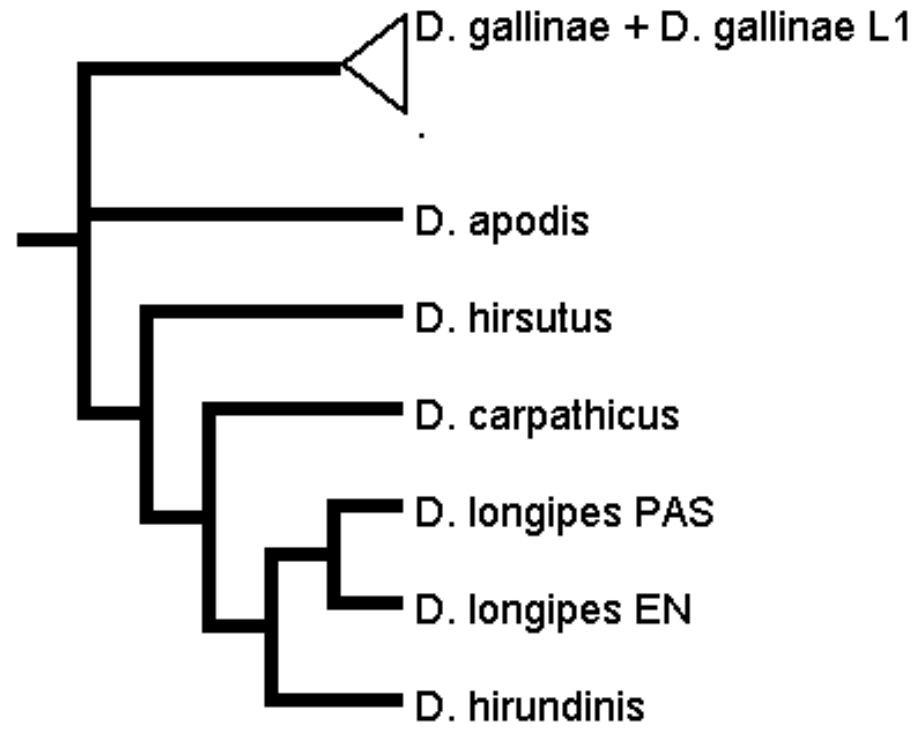

Top32

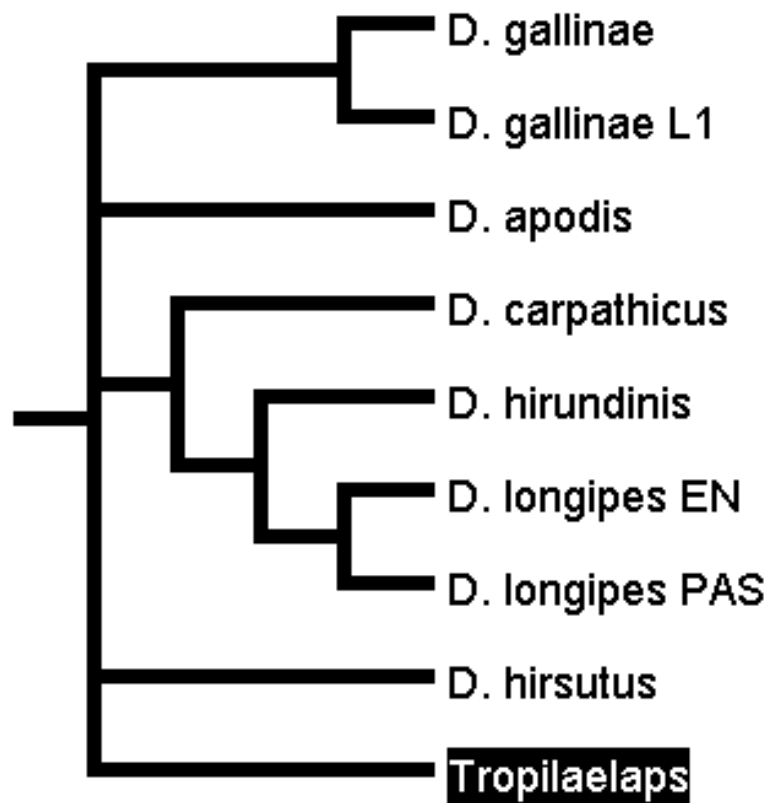

Top33

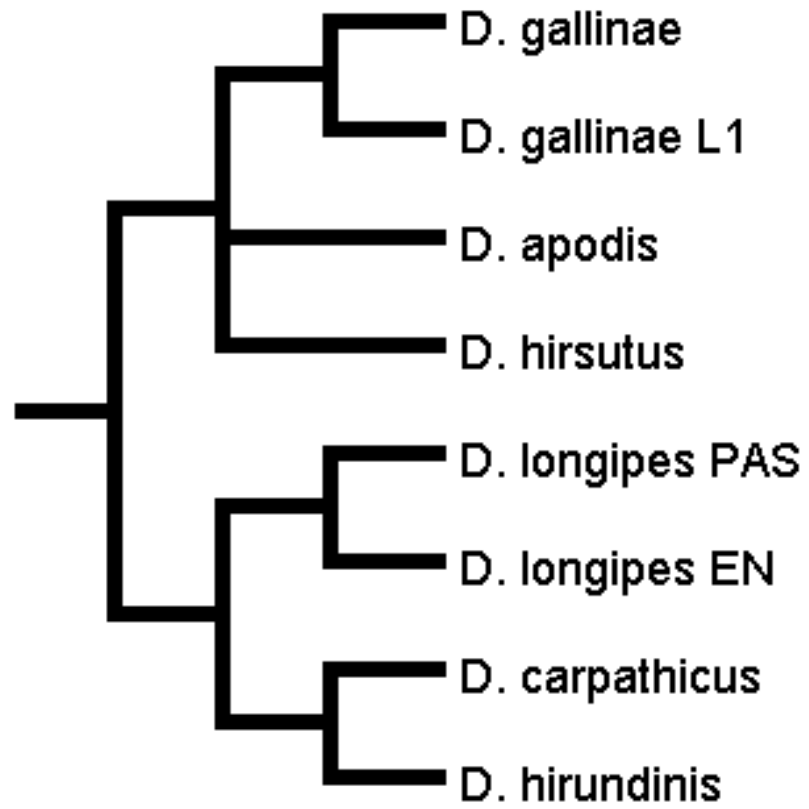

Top35

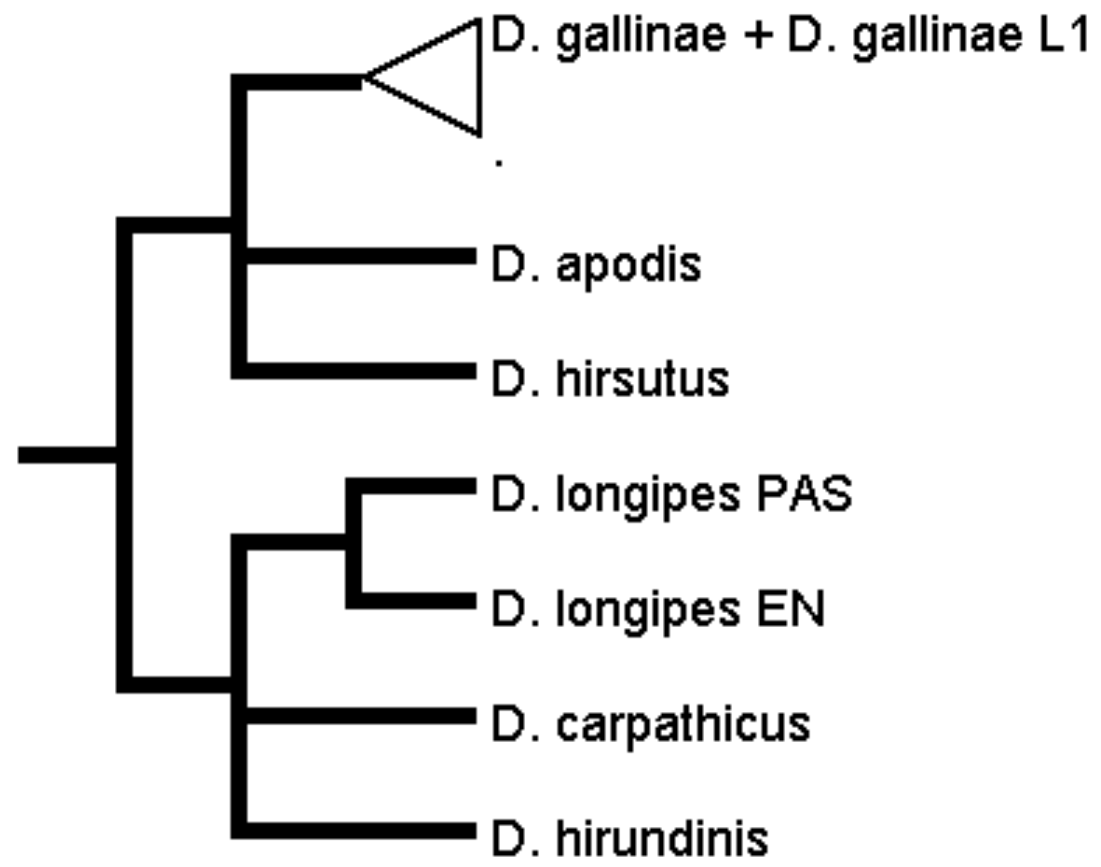

Top36

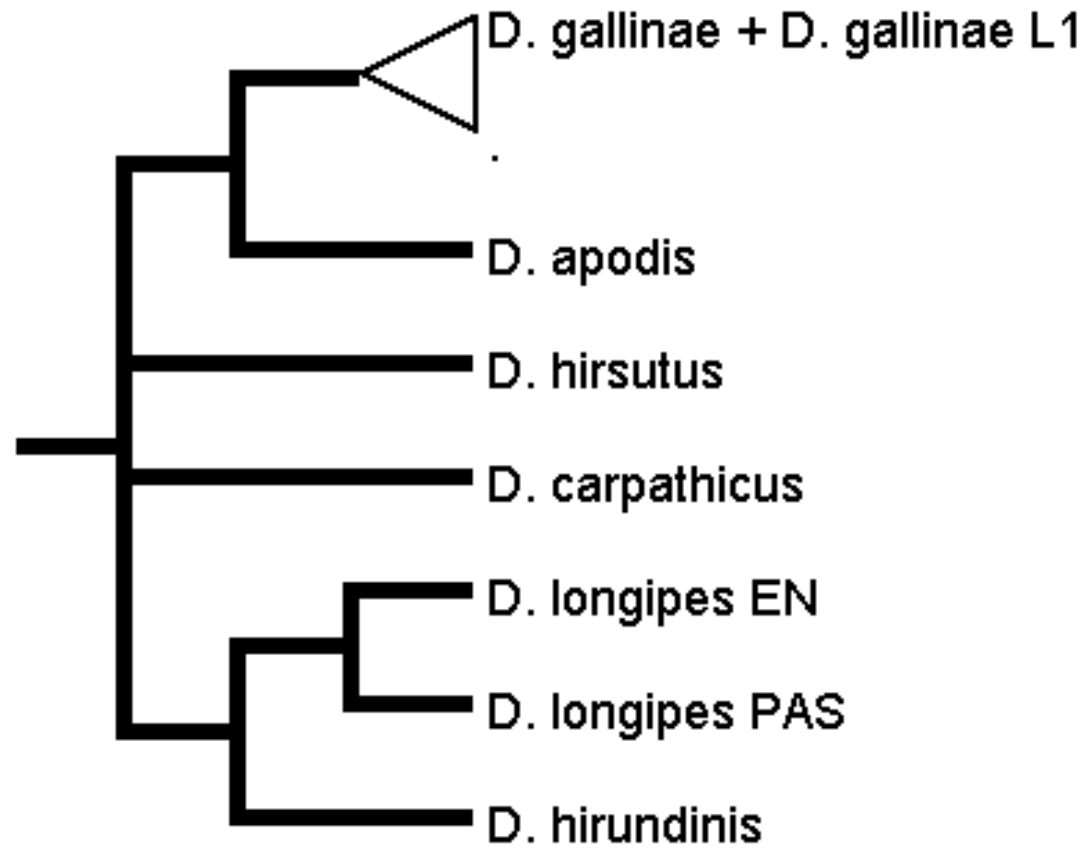

Top37



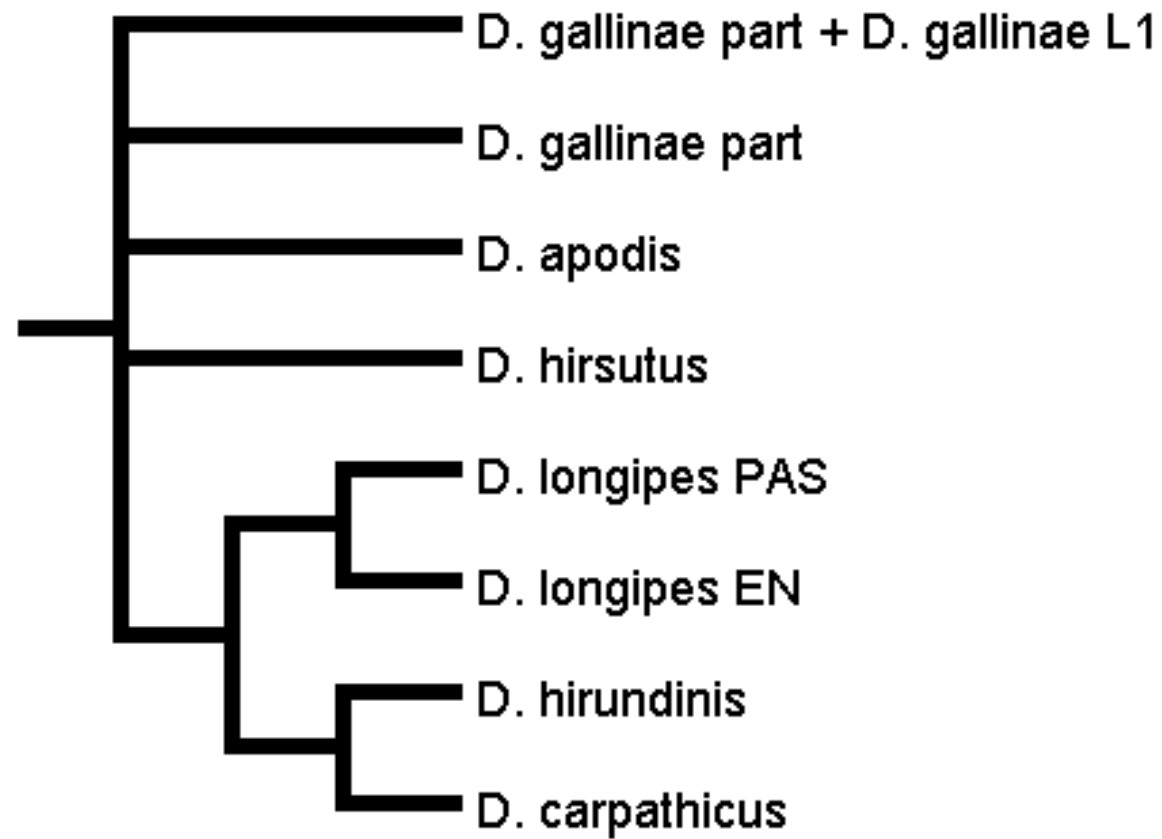

Top38

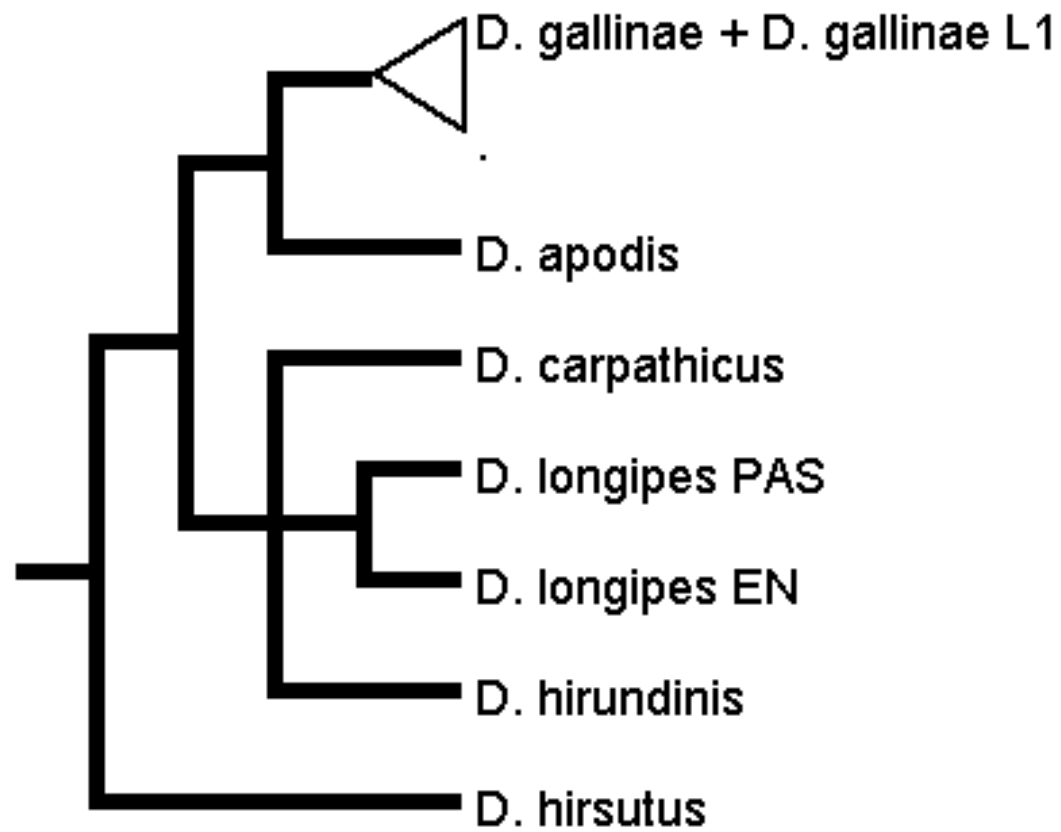

Top39

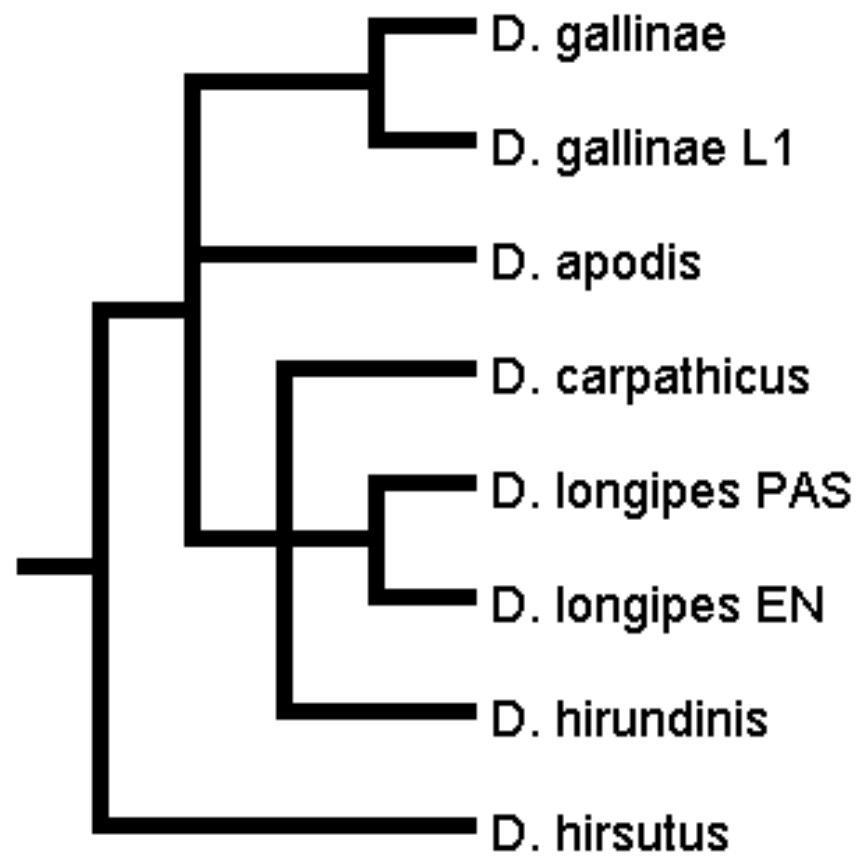

Top40

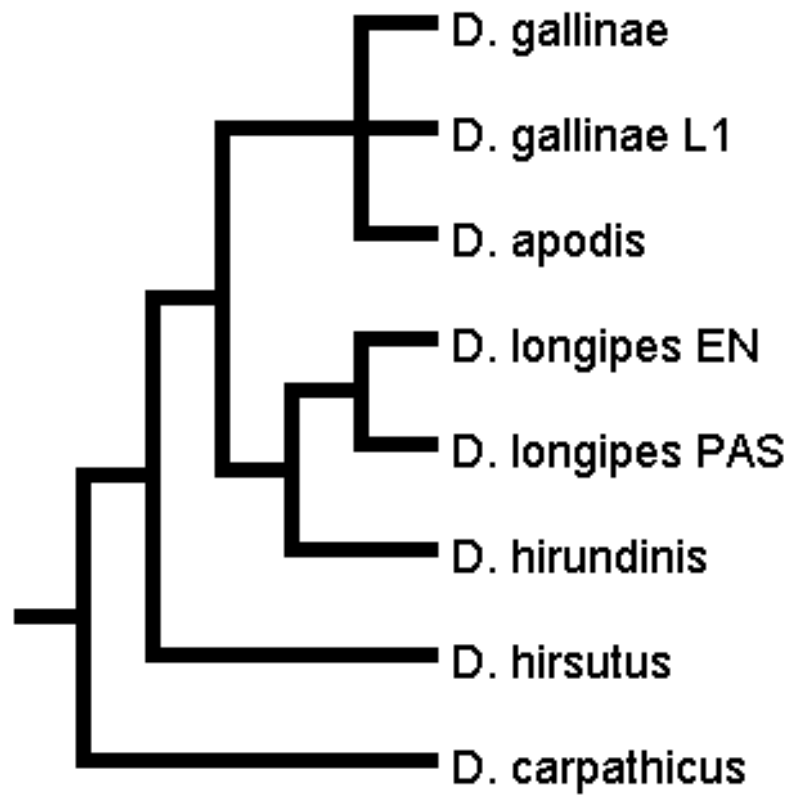

Top41

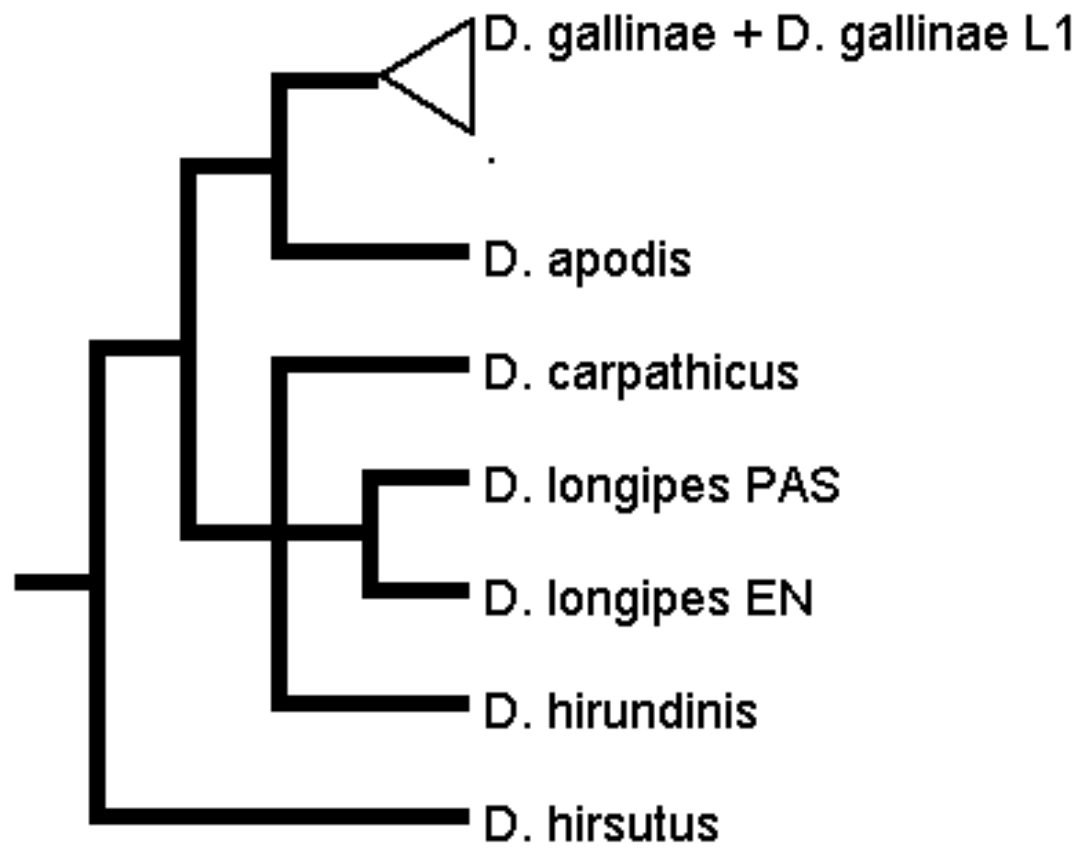

Top42

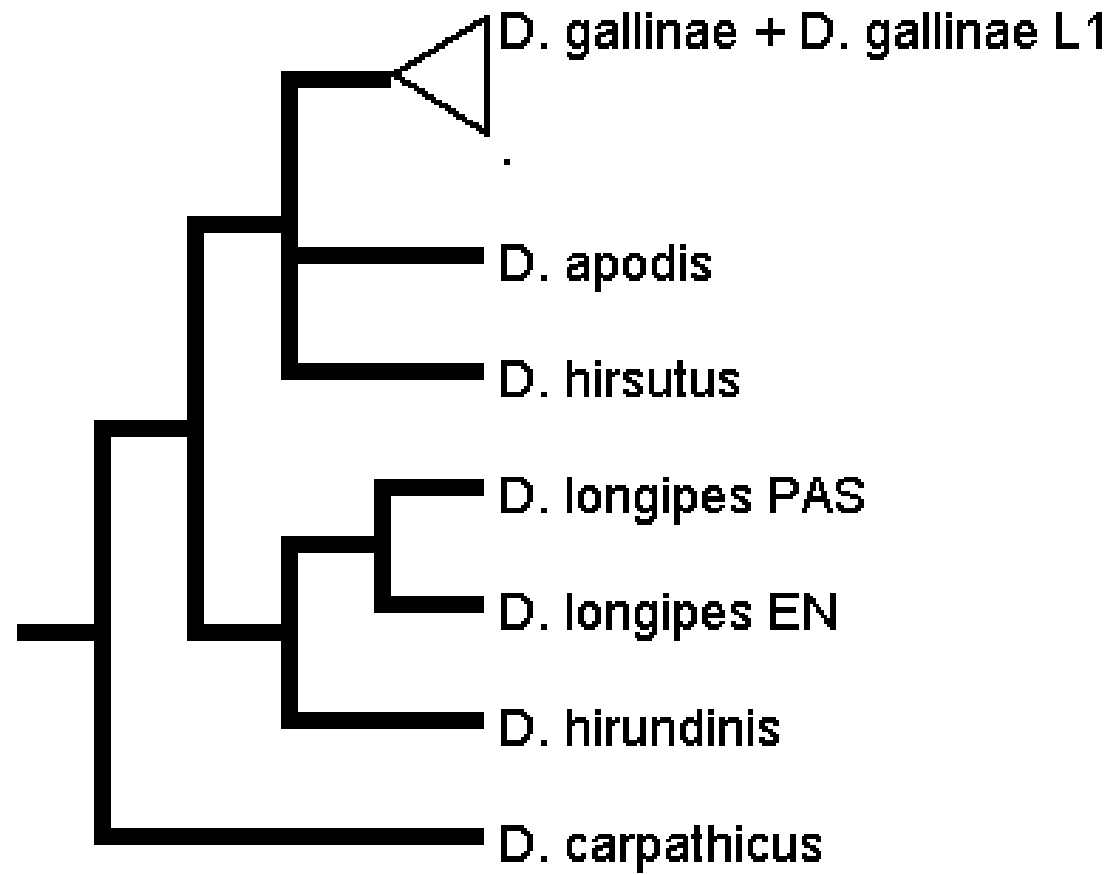

Top43

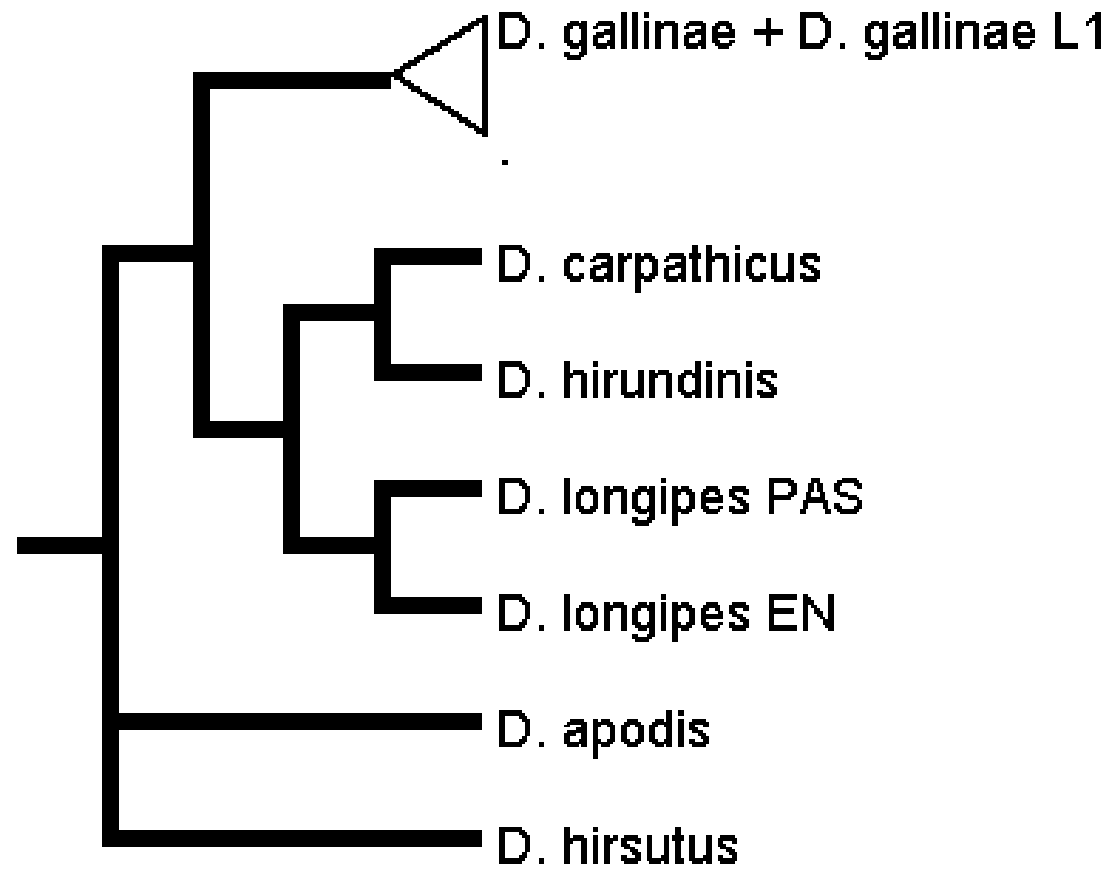

Top44

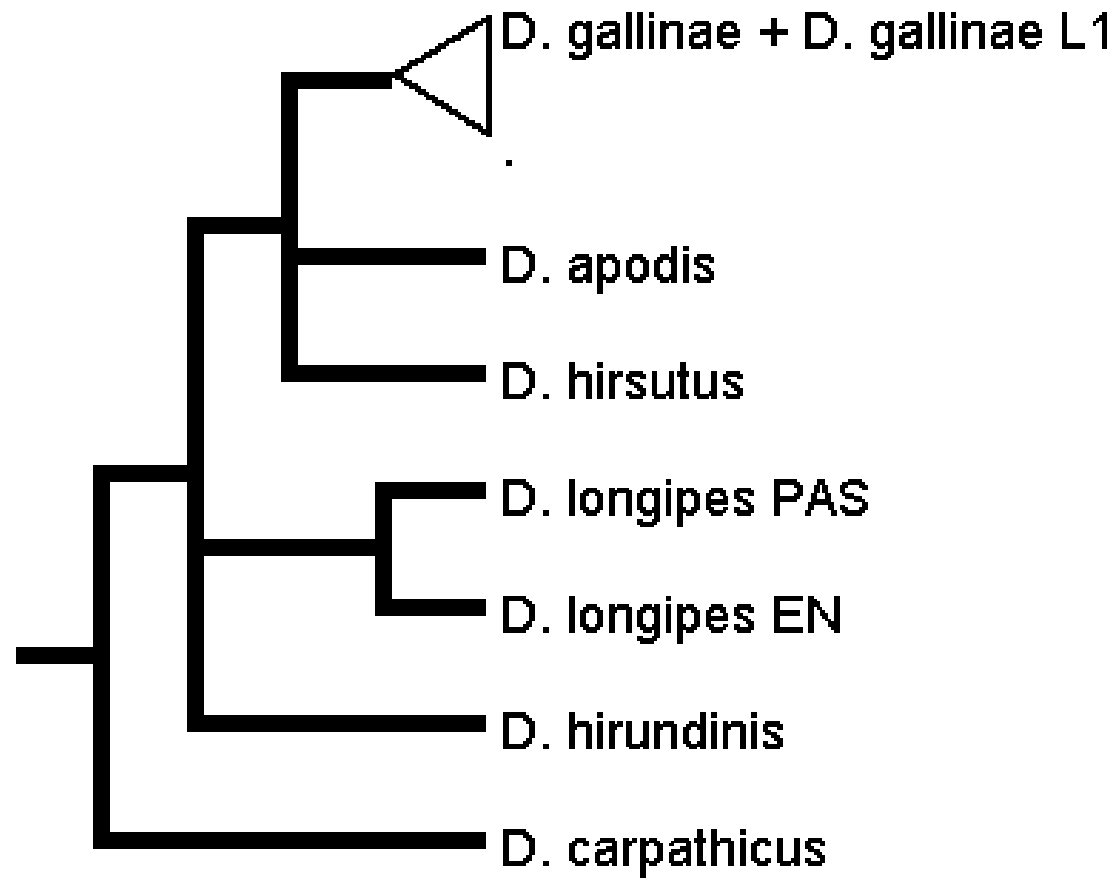

Top45



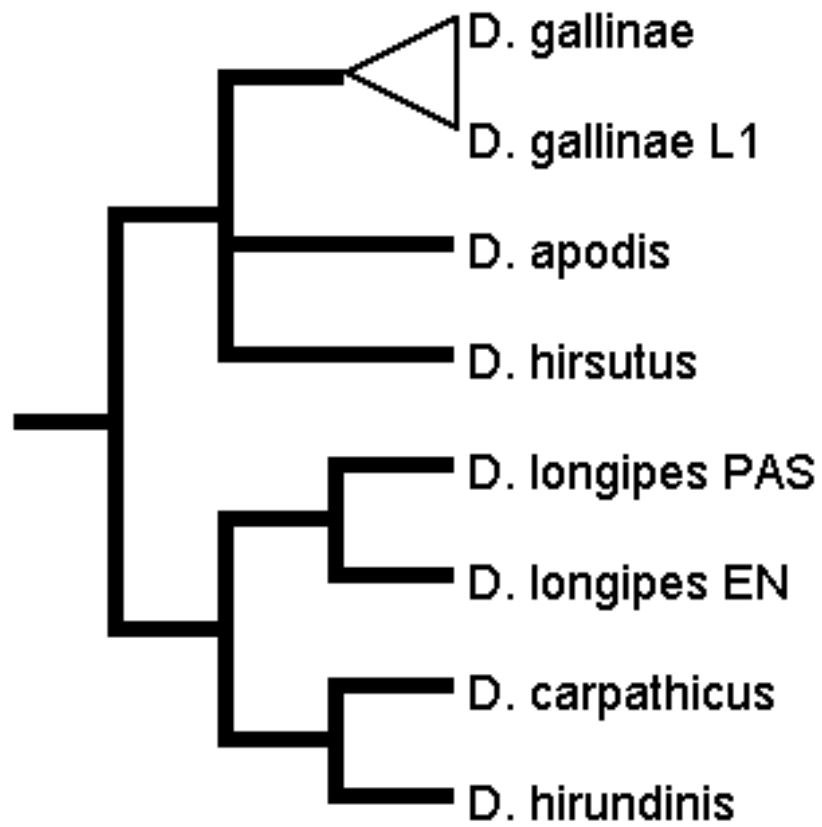

Top46

Frequency of occurrence of topologies obtained in the different combinations tested in multi-gene analyses ordered according to the level of resolution. Solid bars represent the percentage of occurrence of topologies in MP analyses treating with gaps as the fifth state, open bars with gaps as missing data. Level of tree resolution was assessed considering *Dermanyssus* exclusively as follows: 0 = a single node (monophyly of *Dermanyssus*), 1 = specific entities delineated, 2 = 1 + one internal node, 3 = 2 + one internal nodes, and so on until 9 = specific entities delineated + all interrelationships resolved.

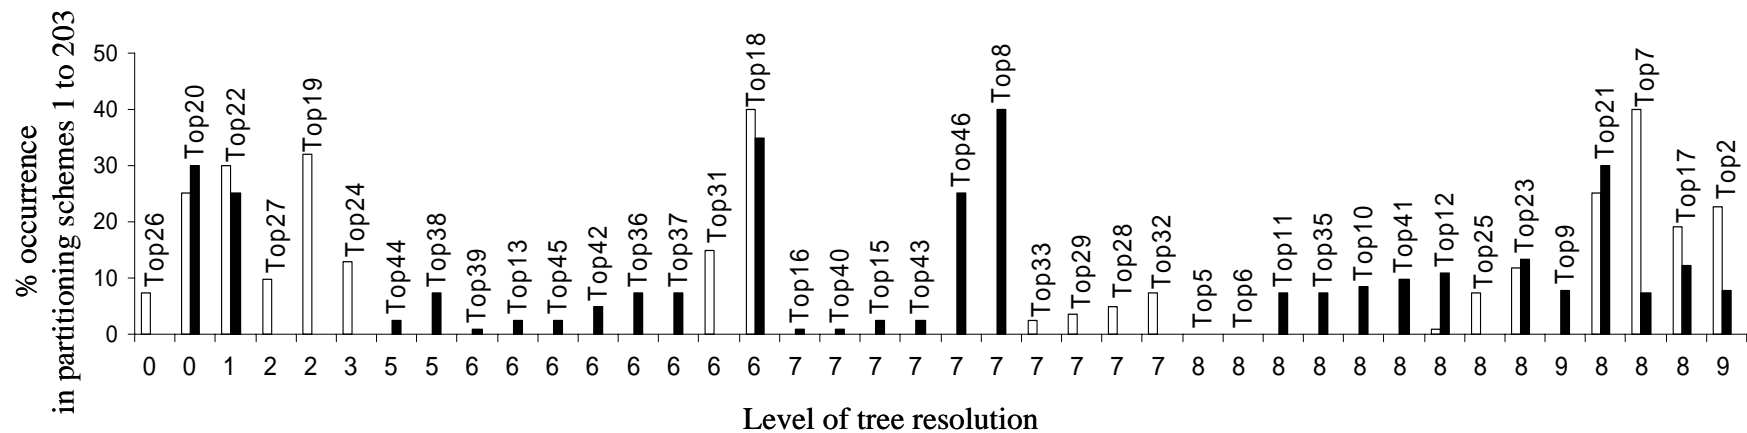

Supplement: s5 [file s5]
