# Supplementary material for: Diversity of Phylogenetic Information According to the Locus and the Taxonomic Level: An Example from a Parasitic Mesostigmatid Mite Genus
Source: MDPI journal article supplement (doi:10.3390/ijms11041704), 2010-04-13
Supplement: s4 [file s4]

## Appendix 4

**Appendix 4-1. Components of partitioning schemes: Elementary datasets (1comb<sub>n</sub>) and of all possible combinations of them (2comb<sub>n</sub> to 6comb<sub>n</sub>).**

|                | COI | 16S | 5.8S | ITS1_2 | Tropo intron n | Tropo exons n<br>& n + 1 |
|----------------|-----|-----|------|--------|----------------|--------------------------|
| <b>1comb1</b>  | x   |     |      |        |                |                          |
| <b>1comb2</b>  |     | x   |      |        |                |                          |
| <b>1comb3</b>  |     |     | x    |        |                |                          |
| <b>1comb4</b>  |     |     |      | x      |                |                          |
| <b>1comb5</b>  |     |     |      |        | x              |                          |
| <b>1comb6</b>  |     |     |      |        |                | x                        |
| <b>2comb1</b>  | x   | x   |      |        |                |                          |
| <b>2comb2</b>  | x   |     | x    |        |                |                          |
| <b>2comb3</b>  |     | x   | x    |        |                |                          |
| <b>2comb4</b>  | x   |     |      | x      |                |                          |
| <b>2comb5</b>  |     | x   |      | x      |                |                          |
| <b>2comb6</b>  |     |     | x    | x      |                |                          |
| <b>2comb7</b>  | x   |     |      |        | x              |                          |
| <b>2comb8</b>  |     | x   |      |        | x              |                          |
| <b>2comb9</b>  |     |     | x    |        | x              |                          |
| <b>2comb10</b> |     |     |      | x      | x              |                          |
| <b>2comb11</b> | x   |     |      |        |                | x                        |
| <b>2comb12</b> |     | x   |      |        |                | x                        |
| <b>2comb13</b> |     |     | x    |        |                | x                        |
| <b>2comb14</b> |     |     |      | x      |                | x                        |
| <b>2comb15</b> |     |     |      |        | x              | x                        |
| <b>3comb1</b>  | x   | x   | x    |        |                |                          |
| <b>3comb2</b>  | x   | x   |      | x      |                |                          |
| <b>3comb3</b>  | x   | x   |      |        | x              |                          |
| <b>3comb4</b>  | x   | x   |      |        |                | x                        |
| <b>3comb5</b>  | x   |     | x    | x      |                |                          |
| <b>3comb6</b>  | x   |     | x    |        | x              |                          |
| <b>3comb7</b>  | x   |     | x    |        |                | x                        |
| <b>3comb8</b>  | x   |     |      | x      | x              |                          |
| <b>3comb9</b>  | x   |     |      | x      |                | x                        |
| <b>3comb10</b> | x   |     |      |        | x              | x                        |
| <b>3comb11</b> |     | x   | x    | x      |                |                          |
| <b>3comb12</b> |     | x   | x    |        | x              |                          |
| <b>3comb13</b> |     | x   | x    |        |                | x                        |
| <b>3comb14</b> |     | x   |      | x      | x              |                          |
| <b>3comb15</b> |     | x   |      | x      |                | x                        |
| <b>3comb16</b> |     | x   |      |        | x              | x                        |

**Appendix 4-1. Cont.**

|                | COI | 16S | 5.8S | ITS1_2 | Tropo intron n | Tropo exons n & n + 1 |
|----------------|-----|-----|------|--------|----------------|-----------------------|
| <b>3comb17</b> |     |     | x    | x      | x              |                       |
| <b>3comb18</b> |     |     | x    | x      |                | x                     |
| <b>3comb19</b> |     |     | x    |        | x              | x                     |
| <b>3comb20</b> |     |     |      | x      | x              | x                     |
| <b>4comb1</b>  | x   | x   | x    | x      |                |                       |
| <b>4comb2</b>  | x   | x   | x    |        | x              |                       |
| <b>4comb3</b>  | x   | x   | x    |        |                | x                     |
| <b>4comb4</b>  | x   | x   |      | x      | x              |                       |
| <b>4comb5</b>  | x   | x   |      | x      |                | x                     |
| <b>4comb6</b>  | x   | x   |      |        | x              | x                     |
| <b>4comb7</b>  | x   |     | x    | x      | x              |                       |
| <b>4comb8</b>  | x   |     | x    | x      |                | x                     |
| <b>4comb9</b>  | x   |     | x    |        | x              | x                     |
| <b>4comb10</b> | x   |     |      | x      | x              | x                     |
| <b>4comb11</b> |     | x   | x    | x      | x              |                       |
| <b>4comb12</b> |     | x   | x    | x      |                | x                     |
| <b>4comb13</b> |     | x   | x    |        | x              | x                     |
| <b>4comb14</b> |     | x   |      | x      | x              | x                     |
| <b>4comb15</b> |     |     | x    | x      | x              | x                     |
| <b>5comb1</b>  | x   | x   | x    | x      | x              |                       |
| <b>5comb2</b>  | x   | x   | x    | x      |                | x                     |
| <b>5comb3</b>  | x   | x   |      | x      | x              | x                     |
| <b>5comb4</b>  | x   |     | x    | x      | x              | x                     |
| <b>5comb5</b>  |     | x   | x    | x      | x              | x                     |
| <b>5comb6</b>  | x   | x   | x    |        | x              | x                     |
| <b>6comb</b>   | x   | x   | x    | x      | x              | x                     |

**Appendix 4-2. Partitioning schemes (pschn).**

|        |         |        |        |        |        |        |
|--------|---------|--------|--------|--------|--------|--------|
| psch1  | 1comb1  | 1comb2 | 1comb3 | 1comb4 | 1comb5 | 1comb6 |
| psch2  | 2comb1  | 1comb3 | 1comb4 | 1comb5 | 1comb6 |        |
| psch3  | 2comb2  | 1comb2 | 1comb4 | 1comb5 | 1comb6 |        |
| psch4  | 2comb3  | 1comb2 | 1comb3 | 1comb5 | 1comb6 |        |
| psch5  | 2comb4  | 1comb2 | 1comb3 | 1comb4 | 1comb6 |        |
| psch6  | 2comb5  | 1comb2 | 1comb3 | 1comb4 | 1comb5 |        |
| psch7  | 2comb6  | 1comb1 | 1comb4 | 1comb5 | 1comb6 |        |
| psch8  | 2comb7  | 1comb1 | 1comb3 | 1comb5 | 1comb6 |        |
| psch9  | 2comb8  | 1comb1 | 1comb3 | 1comb4 | 1comb6 |        |
| psch10 | 2comb9  | 1comb1 | 1comb3 | 1comb4 | 1comb5 |        |
| psch11 | 2comb10 | 1comb1 | 1comb2 | 1comb5 | 1comb6 |        |
| psch12 | 2comb11 | 1comb1 | 1comb2 | 1comb4 | 1comb6 |        |
| psch13 | 2comb12 | 1comb1 | 1comb2 | 1comb4 | 1comb5 |        |
| psch14 | 2comb13 | 1comb1 | 1comb2 | 1comb3 | 1comb6 |        |

**Appendix 4-2. Cont.**

|        |         |         |         |        |        |  |
|--------|---------|---------|---------|--------|--------|--|
| psch15 | 2comb14 | 1comb1  | 1comb2  | 1comb3 | 1comb5 |  |
| psch16 | 2comb15 | 1comb1  | 1comb2  | 1comb3 | 1comb4 |  |
| psch17 | 2comb10 | 2comb15 | 1comb1  | 1comb2 |        |  |
| psch18 | 2comb11 | 2comb14 | 1comb1  | 1comb2 |        |  |
| psch19 | 2comb12 | 2comb13 | 1comb1  | 1comb2 |        |  |
| psch20 | 2comb7  | 2comb15 | 1comb1  | 1comb3 |        |  |
| psch21 | 2comb8  | 2comb14 | 1comb1  | 1comb3 |        |  |
| psch22 | 2comb9  | 2comb13 | 1comb1  | 1comb3 |        |  |
| psch23 | 2comb6  | 2comb15 | 1comb1  | 1comb4 |        |  |
| psch24 | 2comb8  | 2comb12 | 1comb1  | 1comb4 |        |  |
| psch25 | 2comb9  | 2comb11 | 1comb1  | 1comb4 |        |  |
| psch26 | 2comb6  | 2comb14 | 1comb1  | 1comb5 |        |  |
| psch27 | 2comb7  | 2comb12 | 1comb1  | 1comb5 |        |  |
| psch28 | 2comb9  | 2comb10 | 1comb1  | 1comb5 |        |  |
| psch29 | 2comb6  | 2comb13 | 1comb1  | 1comb6 |        |  |
| psch30 | 2comb7  | 2comb11 | 1comb1  | 1comb6 |        |  |
| psch31 | 2comb8  | 2comb10 | 1comb1  | 1comb6 |        |  |
| psch32 | 2comb3  | 2comb15 | 1comb2  | 1comb3 |        |  |
| psch33 | 2comb4  | 2comb14 | 1comb2  | 1comb3 |        |  |
| psch34 | 2comb5  | 2comb13 | 1comb2  | 1comb3 |        |  |
| psch35 | 2comb2  | 2comb15 | 1comb2  | 1comb4 |        |  |
| psch36 | 2comb4  | 2comb12 | 1comb2  | 1comb4 |        |  |
| psch37 | 2comb5  | 2comb11 | 1comb2  | 1comb4 |        |  |
| psch38 | 2comb2  | 2comb14 | 1comb2  | 1comb5 |        |  |
| psch39 | 2comb3  | 2comb12 | 1comb2  | 1comb5 |        |  |
| psch40 | 2comb5  | 2comb10 | 1comb2  | 1comb5 |        |  |
| psch41 | 2comb2  | 2comb13 | 1comb2  | 1comb6 |        |  |
| psch42 | 2comb3  | 2comb11 | 1comb2  | 1comb6 |        |  |
| psch43 | 2comb4  | 2comb10 | 1comb2  | 1comb6 |        |  |
| psch44 | 2comb1  | 2comb15 | 1comb3  | 1comb4 |        |  |
| psch45 | 2comb4  | 2comb9  | 1comb3  | 1comb4 |        |  |
| psch46 | 2comb5  | 2comb8  | 1comb3  | 1comb4 |        |  |
| psch47 | 2comb1  | 2comb14 | 1comb3  | 1comb5 |        |  |
| psch48 | 2comb3  | 2comb9  | 1comb3  | 1comb5 |        |  |
| psch49 | 2comb5  | 2comb7  | 1comb3  | 1comb5 |        |  |
| psch50 | 2comb1  | 2comb13 | 1comb3  | 1comb6 |        |  |
| psch51 | 2comb3  | 2comb8  | 1comb3  | 1comb6 |        |  |
| psch52 | 2comb4  | 2comb7  | 1comb3  | 1comb6 |        |  |
| psch53 | 2comb1  | 2comb12 | 1comb4  | 1comb5 |        |  |
| psch54 | 2comb2  | 2comb9  | 1comb4  | 1comb5 |        |  |
| psch55 | 2comb5  | 2comb6  | 1comb4  | 1comb5 |        |  |
| psch56 | 2comb1  | 2comb11 | 1comb4  | 1comb6 |        |  |
| psch57 | 2comb2  | 2comb8  | 1comb4  | 1comb6 |        |  |
| psch58 | 2comb4  | 2comb6  | 1comb4  | 1comb6 |        |  |
| psch59 | 2comb1  | 2comb10 | 1comb5  | 1comb6 |        |  |
| psch60 | 2comb2  | 2comb7  | 1comb5  | 1comb6 |        |  |
| psch61 | 2comb3  | 2comb6  | 1comb5  | 1comb6 |        |  |
| psch62 | 2comb1  | 2comb10 | 2comb15 |        |        |  |
| psch63 | 2comb1  | 2comb11 | 2comb14 |        |        |  |
| psch64 | 2comb1  | 2comb12 | 2comb13 |        |        |  |

**Appendix 4-2. Cont.**

|         |         |         |         |        |  |  |
|---------|---------|---------|---------|--------|--|--|
| psch65  | 2comb2  | 2comb7  | 2comb15 |        |  |  |
| psch66  | 2comb2  | 2comb8  | 2comb14 |        |  |  |
| psch67  | 2comb2  | 2comb9  | 2comb13 |        |  |  |
| psch68  | 2comb3  | 2comb6  | 2comb15 |        |  |  |
| psch69  | 2comb3  | 2comb8  | 2comb12 |        |  |  |
| psch70  | 2comb3  | 2comb9  | 2comb11 |        |  |  |
| psch71  | 2comb4  | 2comb6  | 2comb14 |        |  |  |
| psch72  | 2comb4  | 2comb7  | 2comb12 |        |  |  |
| psch73  | 2comb4  | 2comb9  | 2comb10 |        |  |  |
| psch74  | 2comb5  | 2comb6  | 2comb13 |        |  |  |
| psch75  | 2comb5  | 2comb7  | 2comb11 |        |  |  |
| psch76  | 2comb5  | 2comb8  | 2comb10 |        |  |  |
| psch77  | 3comb1  | 1comb4  | 1comb5  | 1comb6 |  |  |
| psch78  | 3comb2  | 1comb3  | 1comb5  | 1comb6 |  |  |
| psch79  | 3comb3  | 1comb3  | 1comb4  | 1comb6 |  |  |
| psch80  | 3comb4  | 1comb3  | 1comb4  | 1comb5 |  |  |
| psch81  | 3comb5  | 1comb2  | 1comb5  | 1comb6 |  |  |
| psch82  | 3comb6  | 1comb2  | 1comb4  | 1comb6 |  |  |
| psch83  | 3comb7  | 1comb2  | 1comb4  | 1comb5 |  |  |
| psch84  | 3comb8  | 1comb2  | 1comb3  | 1comb6 |  |  |
| psch85  | 3comb9  | 1comb2  | 1comb3  | 1comb5 |  |  |
| psch86  | 3comb10 | 1comb2  | 1comb3  | 1comb4 |  |  |
| psch87  | 3comb11 | 1comb1  | 1comb5  | 1comb6 |  |  |
| psch88  | 3comb12 | 1comb1  | 1comb4  | 1comb6 |  |  |
| psch89  | 3comb13 | 1comb1  | 1comb4  | 1comb5 |  |  |
| psch90  | 3comb14 | 1comb1  | 1comb3  | 1comb6 |  |  |
| psch91  | 3comb15 | 1comb1  | 1comb3  | 1comb5 |  |  |
| psch92  | 3comb16 | 1comb1  | 1comb3  | 1comb4 |  |  |
| psch93  | 3comb17 | 1comb1  | 1comb2  | 1comb6 |  |  |
| psch94  | 3comb18 | 1comb1  | 1comb2  | 1comb5 |  |  |
| psch95  | 3comb19 | 1comb1  | 1comb2  | 1comb4 |  |  |
| psch96  | 3comb20 | 1comb1  | 1comb2  | 1comb3 |  |  |
| psch97  | 3comb1  | 2comb13 | 1comb6  |        |  |  |
| psch98  | 3comb1  | 2comb14 | 1comb5  |        |  |  |
| psch99  | 3comb1  | 2comb15 | 1comb4  |        |  |  |
| psch100 | 3comb2  | 2comb11 | 1comb6  |        |  |  |
| psch101 | 3comb2  | 2comb12 | 1comb5  |        |  |  |
| psch102 | 3comb2  | 2comb15 | 1comb3  |        |  |  |
| psch103 | 3comb3  | 2comb10 | 1comb6  |        |  |  |
| psch104 | 3comb3  | 2comb12 | 1comb4  |        |  |  |
| psch105 | 3comb3  | 2comb14 | 1comb3  |        |  |  |
| psch106 | 3comb4  | 2comb10 | 1comb5  |        |  |  |
| psch107 | 3comb4  | 2comb11 | 1comb4  |        |  |  |
| psch108 | 3comb4  | 2comb13 | 1comb3  |        |  |  |
| psch109 | 3comb5  | 2comb8  | 1comb6  |        |  |  |
| psch110 | 3comb5  | 2comb9  | 1comb5  |        |  |  |
| psch111 | 3comb5  | 2comb15 | 1comb2  |        |  |  |
| psch112 | 3comb6  | 2comb7  | 1comb6  |        |  |  |
| psch113 | 3comb6  | 2comb9  | 1comb4  |        |  |  |
| psch114 | 3comb6  | 2comb14 | 1comb2  |        |  |  |

**Appendix 4-2. Cont.**

|         |         |         |        |  |  |  |
|---------|---------|---------|--------|--|--|--|
| psch115 | 3comb7  | 2comb7  | 1comb5 |  |  |  |
| psch116 | 3comb7  | 2comb8  | 1comb4 |  |  |  |
| psch117 | 3comb7  | 2comb13 | 1comb2 |  |  |  |
| psch118 | 3comb8  | 2comb6  | 1comb6 |  |  |  |
| psch119 | 3comb8  | 2comb9  | 1comb3 |  |  |  |
| psch120 | 3comb8  | 2comb12 | 1comb2 |  |  |  |
| psch121 | 3comb9  | 2comb6  | 1comb5 |  |  |  |
| psch122 | 3comb9  | 2comb8  | 1comb3 |  |  |  |
| psch123 | 3comb9  | 2comb11 | 1comb2 |  |  |  |
| psch124 | 3comb10 | 2comb6  | 1comb4 |  |  |  |
| psch125 | 3comb10 | 2comb7  | 1comb3 |  |  |  |
| psch126 | 3comb10 | 2comb10 | 1comb2 |  |  |  |
| psch127 | 3comb11 | 2comb4  | 1comb6 |  |  |  |
| psch128 | 3comb11 | 2comb5  | 1comb5 |  |  |  |
| psch129 | 3comb11 | 2comb15 | 1comb1 |  |  |  |
| psch130 | 3comb12 | 2comb3  | 1comb6 |  |  |  |
| psch131 | 3comb12 | 2comb5  | 1comb4 |  |  |  |
| psch132 | 3comb12 | 2comb14 | 1comb1 |  |  |  |
| psch133 | 3comb13 | 2comb3  | 1comb5 |  |  |  |
| psch134 | 3comb13 | 2comb4  | 1comb4 |  |  |  |
| psch135 | 3comb13 | 2comb13 | 1comb1 |  |  |  |
| psch136 | 3comb14 | 2comb2  | 1comb6 |  |  |  |
| psch137 | 3comb14 | 2comb5  | 1comb3 |  |  |  |
| psch138 | 3comb14 | 2comb12 | 1comb1 |  |  |  |
| psch139 | 3comb15 | 2comb2  | 1comb5 |  |  |  |
| psch140 | 3comb15 | 2comb4  | 1comb3 |  |  |  |
| psch141 | 3comb15 | 2comb11 | 1comb1 |  |  |  |
| psch142 | 3comb16 | 2comb2  | 1comb4 |  |  |  |
| psch143 | 3comb16 | 2comb3  | 1comb3 |  |  |  |
| psch144 | 3comb16 | 2comb10 | 1comb1 |  |  |  |
| psch145 | 3comb17 | 2comb1  | 1comb6 |  |  |  |
| psch146 | 3comb17 | 2comb5  | 1comb2 |  |  |  |
| psch147 | 3comb17 | 2comb9  | 1comb1 |  |  |  |
| psch148 | 3comb18 | 2comb1  | 1comb5 |  |  |  |
| psch149 | 3comb18 | 2comb4  | 1comb2 |  |  |  |
| psch150 | 3comb18 | 2comb8  | 1comb1 |  |  |  |
| psch151 | 3comb19 | 2comb1  | 1comb4 |  |  |  |
| psch152 | 3comb19 | 2comb3  | 1comb2 |  |  |  |
| psch153 | 3comb19 | 2comb7  | 1comb1 |  |  |  |
| psch154 | 3comb20 | 2comb1  | 1comb3 |  |  |  |
| psch155 | 3comb20 | 2comb2  | 1comb2 |  |  |  |
| psch156 | 3comb20 | 2comb6  | 1comb1 |  |  |  |
| psch157 | 3comb1  | 3comb20 |        |  |  |  |
| psch158 | 3comb2  | 3comb19 |        |  |  |  |
| psch159 | 3comb3  | 3comb18 |        |  |  |  |
| psch160 | 3comb4  | 3comb17 |        |  |  |  |
| psch161 | 3comb5  | 3comb16 |        |  |  |  |
| psch162 | 3comb6  | 3comb15 |        |  |  |  |
| psch163 | 3comb7  | 3comb14 |        |  |  |  |
| psch164 | 3comb8  | 3comb13 |        |  |  |  |

**Appendix 4-2. Cont.**

|         |         |         |        |  |  |  |
|---------|---------|---------|--------|--|--|--|
| psch165 | 3comb9  | 3comb12 |        |  |  |  |
| psch166 | 3comb10 | 3comb11 |        |  |  |  |
| psch167 | 4comb1  | 1comb1  | 1comb2 |  |  |  |
| psch168 | 4comb2  | 1comb1  | 1comb3 |  |  |  |
| psch169 | 4comb3  | 1comb1  | 1comb4 |  |  |  |
| psch170 | 4comb4  | 1comb1  | 1comb5 |  |  |  |
| psch171 | 4comb5  | 1comb1  | 1comb6 |  |  |  |
| psch172 | 4comb6  | 1comb2  | 1comb3 |  |  |  |
| psch173 | 4comb7  | 1comb2  | 1comb4 |  |  |  |
| psch174 | 4comb8  | 1comb2  | 1comb5 |  |  |  |
| psch175 | 4comb9  | 1comb2  | 1comb6 |  |  |  |
| psch176 | 4comb10 | 1comb3  | 1comb4 |  |  |  |
| psch177 | 4comb11 | 1comb3  | 1comb5 |  |  |  |
| psch178 | 4comb12 | 1comb3  | 1comb6 |  |  |  |
| psch179 | 4comb13 | 1comb4  | 1comb5 |  |  |  |
| psch180 | 4comb14 | 1comb4  | 1comb6 |  |  |  |
| psch181 | 4comb15 | 1comb5  | 1comb6 |  |  |  |
| psch182 | 4comb1  | 2comb1  |        |  |  |  |
| psch183 | 4comb2  | 2comb2  |        |  |  |  |
| psch184 | 4comb3  | 2comb3  |        |  |  |  |
| psch185 | 4comb4  | 2comb4  |        |  |  |  |
| psch186 | 4comb5  | 2comb5  |        |  |  |  |
| psch187 | 4comb6  | 2comb6  |        |  |  |  |
| psch188 | 4comb7  | 2comb7  |        |  |  |  |
| psch189 | 4comb8  | 2comb8  |        |  |  |  |
| psch190 | 4comb9  | 2comb9  |        |  |  |  |
| psch191 | 4comb10 | 2comb10 |        |  |  |  |
| psch192 | 4comb11 | 2comb11 |        |  |  |  |
| psch193 | 4comb12 | 2comb12 |        |  |  |  |
| psch194 | 4comb13 | 2comb13 |        |  |  |  |
| psch195 | 4comb14 | 2comb14 |        |  |  |  |
| psch196 | 4comb15 | 2comb15 |        |  |  |  |
| psch197 | 5comb1  | 1comb1  |        |  |  |  |
| psch198 | 5comb2  | 1comb2  |        |  |  |  |
| psch199 | 5comb3  | 1comb3  |        |  |  |  |
| psch200 | 5comb4  | 1comb4  |        |  |  |  |
| psch201 | 5comb5  | 1comb5  |        |  |  |  |
| psch202 | 5comb6  | 1comb6  |        |  |  |  |
| psch203 | 6comb   |         |        |  |  |  |
