# Supplementary material for: Diversity of Phylogenetic Information According to the Locus and the Taxonomic Level: An Example from a Parasitic Mesostigmatid Mite Genus
Source: Int J Mol Sci. 2010 Apr 13;11(4):1704–34. doi: 10.3390/ijms11041704 (PMC2871134; doi:10.3390/ijms11041704)
Supplement: Supplementary file 1 — Appendix 1 (Sampling and EMBL information for the populations under test in present study) [file app1.xls]

## Sheet: Appendix 1
Appendix 1. Sampling and EMBL information for the populations under test in present study.
Both tropomyosin accession numbers are given in the two right columns in case of heterozygosity, in the first one in case of homozygosity (HOM. in the last column in such a case).
							Step 2 only				EMBL accession numbers
Mite species	Isolate name	Individual name	Host	Context	Country	Departement (France)	COI haplotype	Tropo. haplotype 1		Tropo. haplotype 2	ITS	16S	EF-1alpha	COI	Tropomyosin (HOM. means the individual is homozygous in present locus)
A. casalis	ACA				France	69	Co_Acasalis				AM903317	AM921907	AM930874	AM921868
A. casalis	2.4				France	42	Co_Acasalis				AM903317		AM930875
D. apodis	MAR	MAR1	Swift	on bird -bird care activity	France	69	Co_52	Tro_29	+	Tro_29	AM945880	AM921899	AM930870	AM921880	FM897372	HOM.
D. apodis	MAR	MAR2	Swift	on bird -bird care activity	France	69	Co_52	Tro_29	+	Tro_29	AM945880	AM921899	AM930870	id. AM921880	FN257768	HOM.
D. apodis	GO1		Swift	bird nest - inside a building, in a town	France	30					AM903299	AM921894
D. apodis	GO10		Swift	bird nest - inside a building, in a town	France	30						AM921895
D. apodis	GO12		Swift	bird nest - inside a building, in a town	France	30					AM903309
D. apodis	GO15		Swift	bird nest - inside a building, in a town	France	30					AM903313	AM921896	AM930867
D. apodis	GO16		Swift	bird nest - inside a building, in a town	France	30					AM903313		AM930866
D. apodis	GO26		Swift	bird nest - inside a building, in a town	France	30						AM921900
D. apodis	GO36		Swift	bird nest - inside a building, in a town	France	30								FM179371
D. apodis	GO44		Swift	bird nest - inside a building, in a town	France	30						AM921898
D. apodis	GO46		Swift	bird nest - inside a building, in a town	France	30						AM921897
D. apodis	GO	GO54	Swift	bird nest - inside a building, in a town	France	30					AM930888			AM921874
D. apodis	GO	GO58a	Swift	bird nest - inside a building, in a town	France	30								FM179370
D. apodis	GO	GOCANB	Swift	bird nest - inside a building, in a town	France	30	Co_55	Tro_28	+	Tro_28				FN432409	id. FM897373	HOM.
D. apodis	GO	GO96i	Swift	bird nest - inside a building, in a town	France	30	Co_54	Tro_29	+	Tro_29				FN432408	id. FN257763	id. FN257763
D. apodis	GO	GO96h	Swift	bird nest - inside a building, in a town	France	30	Co_54							FN432407
D. apodis	GO	GO96f	Swift	bird nest - inside a building, in a town	France	30	Co_54	Tro_29	+	Tro_29				FN432406	id. FN257763	id. FN257763
D. apodis	GO	GO96d	Swift	bird nest - inside a building, in a town	France	30	Co_54	Tro_29	+	Tro_29				FN432405	id. FN257763	id. FN257763
D. apodis	GO	GO78b	Swift	bird nest - inside a building, in a town	France	30	Co_52	Tro_28	+	Tro_28					id. FM897373	HOM.
D. apodis	GO	GO78a	Swift	bird nest - inside a building, in a town	France	30	Co_54	Tro_28	+	Tro_28				FN432404	id. FM897373	HOM.
D. apodis	GO	GO69b	Swift	bird nest - inside a building, in a town	France	30	Co_54	Tro_29	+	Tro_29				FN432403	id. FN257763	id. FN257763
D. apodis	GO	GO69a	Swift	bird nest - inside a building, in a town	France	30	Co_54	Tro_29	+	Tro_29				FN432402	id. FN257763	id. FN257763
D. apodis	GO	GO64a	Swift	bird nest - inside a building, in a town	France	30	Co_54		+					FN432401
D. apodis	GO	GO63a	Swift	bird nest - inside a building, in a town	France	30	Co_54		+					FN432400
D. apodis	GO	GO593	Swift	bird nest - inside a building, in a town	France	30	Co_54	Tro_28	+	Tro_28				FN432399	FM897373	HOM.
D. apodis	GO	GO592	Swift	bird nest - inside a building, in a town	France	30	Co_54	Tro_28	+	Tro_29				FN432398	id. FM897373	id. FN257763
D. apodis	GO	GO591	Swift	bird nest - inside a building, in a town	France	30	Co_54	Tro_29	+	Tro_29				FN432397	FN257763	FN257764
D. apodis	GO	GO58a	Swift	bird nest - inside a building, in a town	France	30	Co_54	Tro_29	+	Tro_29				FM179370	id. FN257763	HOM.
D. apodis	GO	GO54c	Swift	bird nest - inside a building, in a town	France	30	Co_54	Tro_28	+	Tro_28				id. AM921874	id. FM897373	id. FM897373
D. apodis	GO	GO54b	Swift	bird nest - inside a building, in a town	France	30	Co_54	Tro_28	+	Tro_28				id. AM921874	id. FM897373	id. FM897373
D. apodis	GO	GO543	Swift	bird nest - inside a building, in a town	France	30	Co_54	Tro_28	+	Tro_28				id. AM921874	id. FM897373	id. FM897373
D. apodis	GO	GO542	Swift	bird nest - inside a building, in a town	France	30	Co_54	Tro_28	+	Tro_29				AM921874	id. FM897373	id. FN257763
D. apodis	GO	GO40b	Swift	bird nest - inside a building, in a town	France	30		Tro_28	+	Tro_28					id. FM897373	HOM.
D. apodis	GO	GO111	Swift	bird nest - inside a building, in a town	France	30		Tro_28	+	Tro_28					id. FM897373	HOM.
D. apodis	GO	GO108c	Swift	bird nest - inside a building, in a town	France	30		Tro_28	+	Tro_28				FN432396	id. FM897373	HOM.
D. apodis	GO	GO102a	Swift	bird nest - inside a building, in a town	France	30	Co_53	Tro_28	+	Tro_29				xxxxxxxx	id. FM897373	id. FN257763
D. carpathicus	BER7	BER7_1	Tit	Bird nest – nestbox in the open-air run of a layer farm	France	1	Co_45bis	Tro_40bis	+	Tro_40bis				id. FN646511	FN646509	HOM.
D. carpathicus	BER7	BER7_2	Tit	Bird nest – nestbox in the open-air run of a layer farm	France	1	Co_45bis	Tro_40bis	+	Tro_38				id. FN646511	id. FN646509	id. FN257827
D. carpathicus	BER7	BER7_3	Tit	Bird nest – nestbox in the open-air run of a layer farm	France	1	Co_45bis	Tro_40bis	+	Tro_38				id. FN646511	id. FN646509	id. FN257827
D. carpathicus	BER7	BER7_4	Tit	Bird nest – nestbox in the open-air run of a layer farm	France	1	Co_45bis	Tro_40bis	+	Tro_38				id. FN646511	id. FN646509	id. FN257827
D. carpathicus	BER7	BER7_5	Tit	Bird nest – nestbox in the open-air run of a layer farm	France	1	Co_45bis	Tro_38bis	+	Tro_38				id. FN646511	id. FN646510	id. FN257827
D. carpathicus	BER7	BER7_6	Tit	Bird nest – nestbox in the open-air run of a layer farm	France	1	Co_45bis	Tro_40bis	+	Tro_40bis				id. FN646511	id. FN646509	HOM.
D. carpathicus	BER7	BER7_7	Tit	Bird nest – nestbox in the open-air run of a layer farm	France	1	Co_45bis	Tro_38bis	+	Tro_38bis				FN646511	FN646510	HOM.
D. carpathicus	BER7	BER7_8	Tit	Bird nest – nestbox in the open-air run of a layer farm	France	1	Co_45bis							id. FN646511
D. carpathicus	BER7	BER7_9	Tit	Bird nest – nestbox in the open-air run of a layer farm	France	1	Co_45bis	Tro_40bis	+	Tro_38				id. FN646511	id. FN646509	id. FN257827
D. carpathicus	BER7	BER7_10	Tit	Bird nest – nestbox in the open-air run of a layer farm	France	1	Co_45bis	Tro_40bis	+	Tro_38bis				id. FN646511	id. FN646509	id. FN646510
D. carpathicus	BER7	BER7_11	Tit	Bird nest – nestbox in the open-air run of a layer farm	France	1	Co_45bis							id. FN646511
D. carpathicus	BER7	BER7_12	Tit	Bird nest – nestbox in the open-air run of a layer farm	France	1	Co_45bis	Tro_40bis	+	Tro_38bis				id. FN646511	id. FN646509	id. FN646510
D. carpathicus	BER7	BER7_13	Tit	Bird nest – nestbox in the open-air run of a layer farm	France	1	Co_45bis	Tro_40bis	+	Tro_38				id. FN646511	id. FN646509	id. FN257827
D. carpathicus	BER7	BER7_14	Tit	Bird nest – nestbox in the open-air run of a layer farm	France	1	Co_45bis	Tro_40bis	+	Tro_40bis				id. FN646511	id. FN646509	HOM.
D. carpathicus	BER7	BER7_15	Tit	Bird nest – nestbox in the open-air run of a layer farm	France	1	Co_45bis	Tro_40bis	+	Tro_38				id. FN646511	id. FN646509	id. FN257827
D. carpathicus	BER7	BER7_16	Tit	Bird nest – nestbox in the open-air run of a layer farm	France	1	Co_45bis	Tro_40bis	+	Tro_38				id. FN646511	id. FN646509	id. FN257827
D. carpathicus	BER7	BER7_17	Tit	Bird nest – nestbox in the open-air run of a layer farm	France	1	Co_45bis		+					id. FN646511
D. carpathicus	BER7	BER7_18	Tit	Bird nest – nestbox in the open-air run of a layer farm	France	1	Co_45bis	Tro_40bis	+	Tro_40bis				id. FN646511	id. FN646509	HOM.
D. carpathicus	BER7	BER7_19	Tit	Bird nest – nestbox in the open-air run of a layer farm	France	1	Co_45bis	Tro_40bis	+	Tro_40bis				id. FN646511	id. FN646509	HOM.
D. carpathicus	BER7	BER7_20	Tit	Bird nest – nestbox in the open-air run of a layer farm	France	1	Co_45bis	Tro_40bis	+	Tro_38bis				id. FN646511	id. FN646509	id. FN646510
D. carpathicus	BER7	BER7_21	Tit	Bird nest – nestbox in the open-air run of a layer farm	France	1	Co_45bis	Tro_40bis	+	Tro_38				id. FN646511	id. FN646509	id. FN257827
D. carpathicus	BER7	BER7_22	Tit	Bird nest – nestbox in the open-air run of a layer farm	France	1	Co_45bis	Tro_40bis	+	Tro_38				id. FN646511	id. FN646509	id. FN257827
D. carpathicus	BER7	BER7_24	Tit	Bird nest – nestbox in the open-air run of a layer farm	France	1	Co_45bis	Tro_38bis	+	Tro_38				id. FN646511	id. FN646510	id. FN257827
D. carpathicus	Ecop	Ecop12	Tit	bird nest - nest box	France	42	Co_51	Tro_37	+	Tro_37				FM208731	FN257833	HOM.
D. carpathicus	Ecop	Ecop3a	Tit	bird nest - nest box	France	42	Co_50	Tro_38	+	Tro_39				FM208729	FN257827	FN257828
D. carpathicus	Ecop		Tit	bird nest - nest box	France	42					AM903314	AM921901	AM930871	AM921873
D. carpathicus	JBO	JBO133f	Tit	bird nest - nest box	France	13	Co_45	Tro_35	+	Tro_35				FN432410	id. FN257829	HOM.
D. carpathicus	JBO	JBO134d	Tit	bird nest - nest box	France	13	Co_45	Tro_34	+	Tro_35				FN432411		FN257829
D. carpathicus	JBO	JBO134f	Tit	bird nest - nest box	France	13	Co_45	Tro_35	+	Tro_35				FN432412	id. FN257829	HOM.
D. carpathicus	JBO	JBO135a	Tit	bird nest - nest box	France	13		Tro_34	+	Tro_34
D. carpathicus	JBO	JBO135B	Tit	bird nest - nest box	France	13	Co_45	Tro_36	+	Tro_37				FN432413	FN257830	FN257833
D. carpathicus	JBO	JBO135f	Tit	bird nest - nest box	France	13	Co_45	Tro_35	+	Tro_35				FN432414	id. FN257829	HOM.
D. carpathicus	JBO	JBO83b	Tit	bird nest - nest box	France	13	Co_45	Tro_40	+	Tro_40				FN432415	FN257765	FN257832
D. carpathicus	JBO59		Tit	bird nest - nest box	France	13					AM930882	AM921902		AM921870
D. carpathicus	JMC	JMC10A	Tit	layer farm	France	62	Co_49	Tro_32	+	Tro_32				AM943021	FN257834	HOM.
D. carpathicus	Mes	Mes1	Tit	bird nest - within a hole in a house's wall	France	42	Co_43	Tro_32	+	Tro_32				FM208715	FN257831	HOM.
D. carpathicus	Mes	Mes3	Tit	bird nest - within a hole in a house's wall	France	42	Co_48							FM208723
D. carpathicus	RQ	RQ18	Redstart	bird nest - girder within a building	France	42	Co_43	Tro_32	+	Tro_33				FN432416	FM897375	FN257836
D. carpathicus	RQ	RQ20	Redstart	bird nest - girder within a building	France	42	Co_44	Tro_30	+	Tro_31				FN432417
D. carpathicus	RQ	RQ22	Redstart	bird nest - girder within a building	France	42	Co_45							FN432418
D. carpathicus	RQ	RQ23	Redstart	bird nest - girder within a building	France	42	Co_46	Tro_32	+	Tro_33				FN432419
D. carpathicus	RQ	RQ24	Redstart	bird nest - girder within a building	France	42	Co_47							FN432420
D. carpathicus	RQ		Redstart	bird nest - girder within a building	France	42					AM903316	AM921903	AM930872	AM921876
D. gallinae	8002	8002b	Layer hen	layer farm - cages	France	26	Co_1	Tro_3	+	Tro_3				FM208713	FN257814	HOM.
D. gallinae	8003	8003b1a	Layer hen	layer farm - cages	France	38	Co_1	Tro_1	+	Tro_1				FM208733	FN257811	HOM.
D. gallinae	8003	8003b1c	Layer hen	layer farm - cages	France	38	Co_1	Tro_3	+	Tro_3				id. FM208733	FN257812	HOM.
D. gallinae	8004	8004a	Layer hen	amateur layer house	France	42	Co_8	Tro_2	+	Tro_2				FM208722	FN257770	HOM.
D. gallinae	8004	8004b	Layer hen	amateur layer house	France	42	Co_8	Tro_2	+	Tro_2				id. FM208722	FM897374	HOM.
D. gallinae	8004	8004e	Layer hen	amateur layer house	France	42		Tro_2	+	Tro_2					FN257771	HOM.
D. gallinae	8006B1	8006B16a	Layer hen	layer farm - on ground	France	1	Co_4	Tro_2	+	Tro_2					id. FN257781	HOM.
D. gallinae	8006B1	8006B16d	Layer hen	layer farm - on ground	France	1	Co_4	Tro_2	+	Tro_16				FN432424	id. FN257781	id. FN257813
D. gallinae	8006B1	8006B16g	Layer hen	layer farm - on ground	France	1	Co_4	Tro_2	+	Tro_17				FN432427	id. FN257781	FN398092
D. gallinae	8006B1	8006B16h	Layer hen	layer farm - on ground	France	1	Co_4	Tro_3	+	Tro_16				FN432428	id. FN257812	id. FN257813
D. gallinae	8006B1	8006B1M2g	Layer hen	layer farm - on ground	France	1	Co_4	Tro_2	+	Tro_1				FN432439	id. FN257781	id. FN257872
D. gallinae	8006B1	8006B1M2h	Layer hen	layer farm - on ground	France	1	Co_4	Tro_17	+	Tro_2				FN432440	id. FN398092	id. FN257781
D. gallinae	8006B1	8006B1M2l	Layer hen	layer farm - on ground	France	1	Co_4	Tro_2	+	Tro_2				FN432444	id. FN257781	id. FN257781
D. gallinae	8007	8007a	Layer hen	layer farm - on ground	Belgium		Co_6	Tro_3	+	Tro_21				FM208717	FN257820	FN257821
D. gallinae	8007	8007b	Layer hen	layer farm - on ground	Belgium		Co_6	Tro_3	+	Tro_3				id. FM208717	FN257815	HOM.
D. gallinae L1	8008	8008g	Pigeon	pigeon breeding facility - aviary	France	69	Co_34	Tro_8	+	Tro_10				FM208712	FN257787	FN257788
D. gallinae L1	8008	8008h	Pigeon	pigeon breeding facility - aviary	France	69	Co_34	Tro_8	+	Tro_10				id. FM208712	FN257789	FN257790
D. gallinae L1	8008	8008i	Pigeon	pigeon breeding facility - aviary	France	69	Co_34	Tro_8	+	Tro_10				id. FM208712	FN257791	FN257792
D. gallinae	8009	8009a	Layer hen	layer farm - cages	France	69	Co_1	Tro_20	+	Tro_2				FM208724	FN257774	FN257775
D. gallinae	8010	8010a	Layer hen	layer farm - on ground	France	26	Co_1	Tro_16	+	Tro_16				FN432460	FN257813	HOM.
D. gallinae	8010	8010c	Layer hen	layer farm - on ground	France	26	Co_1	Tro_2	+	Tro_2				FN432461	FN257776	HOM.
D. gallinae	8011	8011a	Layer hen	layer farm - cages	France	26	Co_1	Tro_2	+	Tro_2				FN432462	FN257777	HOM.
D. gallinae	8011	8011b	Layer hen	layer farm - cages	France	26	Co_1	Tro_2	+	Tro_2				FN432463	FN257778	HOM.
D. gallinae	8011	8011c	Layer hen	layer farm - cages	France	26	Co_1	Tro_2	+	Tro_2				FN432464	FN257779	HOM.
D. gallinae	8012	8012a	Layer hen	chicken farm - Bresse (epinettes)	France	1	Co_7	Tro_3	+	Tro_3				FM208739	FN257822	HOM.
D. gallinae	8012	8012d	Layer hen	chicken farm - Bresse (epinettes)	France	1	Co_7	Tro_3	+	Tro_3				id. FM208739	FN257816	HOM.
D. gallinae	8018	8018a	Layer hen	layer farm - cages	France	7	Co_1	Tro_19	+	Tro_2				FN432465	FN257780	FN257781
D. gallinae	8018	8018b	Layer hen	layer farm - cages	France	7	Co_1	Tro_2	+	Tro_2				FN432466	FN257782	HOM.
D. gallinae	8019	8019a	Layer hen	layer farm - on ground	France	7	Co_1	Tro_2	+	Tro_2				FN432467	FN257783	HOM.
D. gallinae	8020	8020a	Layer hen	layer farm	France	49		Tro_2	+	Tro_2					FN257867	HOM.
D. gallinae	8020	8020b	Layer hen	layer farm	France	49	Co_1	Tro_2	+	Tro_1				FN432468	FN257785	FN257786
D. gallinae	8020	8020c	Layer hen	layer farm	France	49	Co_1	Tro_2	+	Tro_1				FN432469	FN257868	FN257869
D. gallinae	8020	8020d	Layer hen	layer farm	France	49		Tro_2	+	Tro_1					id. FN257781	id. FN257872
D. gallinae	8020	8020e	Layer hen	layer farm	France	49	Co_1	Tro_3	+	Tro_3				FN432470	FN257817	HOM.
D. gallinae	8020	8020f	Layer hen	layer farm	France	49	Co_9	Tro_16	+	Tro_1				FN432471	FN257870	FN257871
D. gallinae	8020	8020m	Layer hen	layer farm	France	49	Co_10	Tro_3	+	Tro_2				FN432478	FN257873	FN257874
D. gallinae	8022	8022a	Layer hen	layer farm	France	49		Tro_3	+	Tro_2					id. FN257812	id. FN257781
D. gallinae L1	9001	9001a	Pigeon	pigeon breeding facility - aviary	France	69	Co_35	Tro_10	+	Tro_10				id. AM921875	id. FN257788	HOM.
D. gallinae L1	9001	9001b	Pigeon	pigeon breeding facility - aviary	France	69	Co_34	Tro_10	+	Tro_10				id. FM208712	id. FN257788	HOM.
D. gallinae L1	9001	9001c	Pigeon	pigeon breeding facility - aviary	France	69	Co_34	Tro_10	+	Tro_10				id. FM208712	id. FN257788	HOM.
D. gallinae L1	9001	9001d	Pigeon	pigeon breeding facility - aviary	France	69	Co_34	Tro_10	+	Tro_10				id. FM208712	id. FN257788	HOM.
D. gallinae L1	9001	9001e	Pigeon	pigeon breeding facility - aviary	France	69	Co_34	Tro_10	+	Tro_10				id. FM208712	id. FN257788	HOM.
D. gallinae L1	9001	9001f	Pigeon	pigeon breeding facility - aviary	France	69	Co_34	Tro_10	+	Tro_10				id. FM208712	id. FN257788	HOM.
D. gallinae L1	9001	9001g	Pigeon	pigeon breeding facility - aviary	France	69	Co_34	Tro_10	+	Tro_10				id. FM208712	id. FN257788	HOM.
D. gallinae L1	9001	9001h	Pigeon	pigeon breeding facility - aviary	France	69	Co_34	Tro_10	+	Tro_10				id. FM208712	id. FN257788	HOM.
D. gallinae L1	9001	9001i	Pigeon	pigeon breeding facility - aviary	France	69	Co_34	Tro_10	+	Tro_10				id. FM208712	id. FN257788	HOM.
D. gallinae L1	9001	9001j	Pigeon	pigeon breeding facility - aviary	France	69	Co_35	Tro_10	+	Tro_10				id. AM921875	id. FN257788	HOM.
D. gallinae L1	9001	9001k	Pigeon	pigeon breeding facility - aviary	France	69	Co_34	Tro_10	+	Tro_10				id. FM208712	id. FN257788	HOM.
D. gallinae L1	9001	9001l	Pigeon	pigeon breeding facility - aviary	France	69	Co_34	Tro_10	+	Tro_10				id. FM208712	id. FN257788	HOM.
D. gallinae L1	9001	9001m	Pigeon	pigeon breeding facility - aviary	France	69	Co_34	Tro_10	+	Tro_10				id. FM208712	id. FN257788	HOM.
D. gallinae L1	9001	9001n	Pigeon	pigeon breeding facility - aviary	France	69	Co_34	Tro_10	+	Tro_10				id. FM208712	id. FN257788	HOM.
D. gallinae L1	9001	9001o	Pigeon	pigeon breeding facility - aviary	France	69	Co_34	Tro_10	+	Tro_10				id. FM208712	id. FN257788	HOM.
D. gallinae L1	9001	9001p	Pigeon	pigeon breeding facility - aviary	France	69	Co_35	Tro_10	+	Tro_10				id. AM921875	id. FN257788	HOM.
D. gallinae L1	9001	9001q	Pigeon	pigeon breeding facility - aviary	France	69	Co_34	Tro_10	+	Tro_10				id. FM208712	id. FN257788	HOM.
D. gallinae L1	9001	9001r	Pigeon	pigeon breeding facility - aviary	France	69	Co_34	Tro_10	+	Tro_10				id. FM208712	id. FN257788	HOM.
D. gallinae L1	9001	9001s	Pigeon	pigeon breeding facility - aviary	France	69	Co_34	Tro_10	+	Tro_10				id. FM208712	id. FN257788	HOM.
D. gallinae L1	9001	9001t	Pigeon	pigeon breeding facility - aviary	France	69	Co_34	Tro_10	+	Tro_10				id. FM208712	id. FN257788	HOM.
D. gallinae L1	9001	9001u	Pigeon	pigeon breeding facility - aviary	France	69	Co_34	Tro_10	+	Tro_10				id. FM208712	id. FN257788	HOM.
D. gallinae L1	9001	9001v	Pigeon	pigeon breeding facility - aviary	France	69	Co_34	Tro_10	+	Tro_10				id. FM208712	id. FN257788	HOM.
D. gallinae L1	9001	9001w	Pigeon	pigeon breeding facility - aviary	France	69	Co_34	Tro_10	+	Tro_10				id. FM208712	id. FN257788	HOM.
D. gallinae L1	9001	9001x	Pigeon	pigeon breeding facility - aviary	France	69	Co_34	Tro_10	+	Tro_10				id. FM208712	id. FN257788	HOM.
D. gallinae	BER	BER1	Layer hen	chicken farm - Bresse (epinettes)	France	1	Co_15	Tro_1	+	Tro_3				FN432487	FN257877	FN257878
D. gallinae	BER	BER2	Layer hen	chicken farm - Bresse (epinettes)	France	1	Co_15	Tro_2	+	Tro_3				FN432488	id. FN257781	id. FN257812
D. gallinae	BER	BER3	Layer hen	chicken farm - Bresse (epinettes)	France	1	Co_15	Tro_1	+	Tro_3				FN432489	id. FN257872	id. FN257812
D. gallinae L1	CANIM	CANIM	Various pet birds	bird pet shop	France	69	Co_34	Tro_9	+	Tro_8				FM208734	FN257799	FN257800
D. gallinae	Chab	Chab3	Layer hen	layer farm	France	1	Co_16	Tro_2	+	Tro_2	AM931074	AM921886	AM930857	FN432490	FN257806	HOM.
D. gallinae	Chab	Chab4	Layer hen	layer farm	France	1	Co_17	Tro_2	+	Tro_2	AM931074	AM921886	AM930857	FN432491	FN257807	HOM.
D. gallinae	Chab	Chab5	Layer hen	layer farm	France	1	Co_16	Tro_2	+	Tro_2	AM931074	AM921886	AM930857	FN432492	FN257808	HOM.
D. gallinae L1	COL	COL1	Pigeon	on bird - care activity	France	69	Co_35	Tro_8	+	Tro_8	AM903307	AM921892	AM930854	AM921875	FN257803	HOM.
D. gallinae L1	COL	COL3	Pigeon	on bird - care activity	France	69	Co_35	Tro_11	+	Tro_12	AM903307	AM921892	AM930854	id. AM921875	FN257804	FN257805
D. gallinae	DR		Fringillidae (Passeriform)	cage	Spain						AM931073	AM921885	AM930856
D. gallinae	F29	F29b	Layer hen	layer farm - cages	France	29	Co_1	Tro_2	+	Tro_2				FN432493	FN257784	HOM.
D. gallinae	F38	F38_6002	Layer hen	layer farm - cages	France	38	Co_1	Tro_4	+	Tro_1				FN432494	FN257809	FN257810
D. gallinae	F56	F56b	Layer hen	layer farm - cages	France	56	Co_1	Tro_1	+	Tro_1				FN432495	id. FN257872	HOM.
D. gallinae	Fa1		Layer hen	layer farm	Norway						AM931072	AM921884	AM930855	AM921853
D. gallinae	IL	IL202A	European starling	bird nest - nest box	The Netherlands		Co_27	Tro_27	+	Tro_1				FN432496	FN257902	FN257903
D. gallinae	IL	IL202C	European starling	bird nest - nest box	The Netherlands		Co_28	Tro_23	+	Tro_23				FN432497	FN257826	HOM.
D. gallinae	IL	IL202D	European starling	bird nest - nest box	The Netherlands			Tro_23	+	Tro_22					FN257883	FN257884
D. gallinae	IL	IL202m	European starling	bird nest - nest box	The Netherlands		Co_28							FN432498
D. gallinae	IL	IL202n	European starling	bird nest - nest box	The Netherlands		Co_27							FN432499
D. gallinae	IL	IL202o	European starling	bird nest - nest box	The Netherlands		Co_28	Tro_1	+	Tro_5				FN432500	FN257885	FN257886
D. gallinae	IL	IL202p	European starling	bird nest - nest box	The Netherlands		Co_28	Tro_51	+	Tro_52				FN432501	FN398089	FN398090
D. gallinae	IL	IL202q	European starling	bird nest - nest box	The Netherlands		Co_26	Tro_53	+	Tro_53				FN432502	FN398091	HOM.
D. gallinae	IL	IL2131	European starling	bird nest - nest box	The Netherlands			Tro_49	+	Tro_27					FN257910	FN257911
D. gallinae	IL	IL2132	European starling	bird nest - nest box	The Netherlands		Co_27	Tro_50	+	Tro_22				FM207499	FN257881	FN257882
D. gallinae	IL	IL2133	European starling	bird nest - nest box	The Netherlands		Co_27	Tro_50	+	Tro_27				id. FM207499	FN257906	FN257907
D. gallinae	IL	IL2272	European starling	bird nest - nest box	The Netherlands		Co_26	Tro_27	+	Tro_27				FM207496	FN257895	HOM.
D. gallinae	IL	IL2273	European starling	bird nest - nest box	The Netherlands		Co_26	Tro_6	+	Tro_7				id. FM207496	FN257896	FN257897
D. gallinae	IL	IL302A	European starling	bird nest - nest box	The Netherlands		Co_27							FN432503
D. gallinae	IL	IL302B	European starling	bird nest - nest box	The Netherlands		Co_29							FN432504
D. gallinae	IL	IL302e	European starling	bird nest - nest box	The Netherlands			Tro_5	+	Tro_6					FN257887	FN257888
D. gallinae	IL	IL302f	European starling	bird nest - nest box	The Netherlands		Co_30	Tro_1	+	Tro_54				FN432505	FN257908	FN257909
D. gallinae	IL	IL302h	European starling	bird nest - nest box	The Netherlands		Co_26	Tro_49	+	Tro_55				FN432506	FN257912	FN257913
D. gallinae	IL	IL302m	European starling	bird nest - nest box	The Netherlands		Co_26	Tro_6	+	Tro_7				FN432507	FN257889	FN257890
D. gallinae	IL	IL302n	European starling	bird nest - nest box	The Netherlands		Co_26	Tro_27	+	Tro_2				FN432508	FN257900	FN257901
D. gallinae	IL	IL302o	European starling	bird nest - nest box	The Netherlands		Co_27	Tro_7	+	Tro_27				FN432509	FN257891	FN257892
D. gallinae	IL	IL302p	European starling	bird nest - nest box	The Netherlands		Co_27	Tro_6	+	Tro_24				FN432510	FN257893	FN257894
D. gallinae	IL	IL302q	European starling	bird nest - nest box	The Netherlands		Co_27	Tro_56	+	Tro_57				FN432511	FN257898	FN257899
D. gallinae	JBO46	JBO461	Tit	bird nest - nest box	France	13	Co_31	Tro_26	+	Tro_3				FM208736	FN257823	FN257824
D. gallinae	JBO46	JBO464	Tit	bird nest - nest box	France	13	Co_31	Tro_26	+	Tro_26				id. FM208736	FN257825	HOM.
D. gallinae	JBO75	JBO75a	Tit	bird nest - nest box	France	13	Co_32							FN432512
D. gallinae	JBO75	JBO75b	Tit	bird nest - nest box	France	13	Co_32	Tro_3	+	Tro_60				FN432513	FN257904	FN257905
D. gallinae	JBO75	JBO75c	Tit	bird nest - nest box	France	13	Co_32	Tro_59	+	Tro_3				FN432514	FN257916	FN257917
D. gallinae	JBO90	JBO90a	Tit	bird nest - nest box	France	13	Co_32							FN432515
D. gallinae	JBO90	JBO90b	Tit	bird nest - nest box	France	13	Co_32							FN432516
D. gallinae	JBO90	JBO90c	Tit	bird nest - nest box	France	13	Co_32							FN432517
D. gallinae	LB18	LB181	House martin	bird nest - from barn	France	18	Co_21	Tro_1	+	Tro_1	AM930889	AM921908	AM930876	FN432518	FN257801	HOM.
D. gallinae	LB18	LB183	House martin	bird nest - from barn	France	18	Co_22	Tro_1	+	Tro_1	AM930889	AM921908	AM930876	AM921867	FN257802	HOM.
D. gallinae L1	LC	LC1	Pigeon	pigeon breeding facility - aviary	France	26	Co_36	Tro_13	+	Tro_11	AM903306	AM921891	AM930863	AM921859	FN257797	FN257798
D. gallinae L1	LC	LC4	Pigeon	pigeon breeding facility - aviary	France	26	Co_36	Tro_11	+	Tro_11	AM903306	AM921891	AM930863	id. AM921859	FN257793	HOM.
D. gallinae L1	PI	Pl1	Pigeon	bird nest - in town	France	13	Co_35	Tro_11	+	Tro_11	FM17937	FM179375		AM921860	FN257794	HOM.
D. gallinae L1	PI	Pl2	Pigeon	bird nest - in town	France	13	Co_35	Tro_14	+	Tro_11	FM17937	FM179375		id. AM921860	FN257795	FN257796
D. gallinae	PO1	PO1b	Layer hen	layer farm	Poland		Co_18	Tro_3	+	Tro_3	AM903302		AM930861	AM921854	FN257818	HOM.
D. gallinae	PO2	PO2A	Layer hen	layer farm	Poland		Co_18	Tro_3	+	Tro_3		AM921914		FN432520	FN257819	HOM.
D. gallinae	PO2	PO2B	Layer hen	layer farm	Poland		Co_19	Tro_2	+	Tro_1		AM921914		FN432521	FN257875	FN257876
D. gallinae	ROL1	ROL12	Roller	on bird - nest box	France	13		Tro_15	+	Tro_2	AM903304	AM921910			FN398095	id. FN257781
D. gallinae	ROL1	ROL15	Roller	on bird - nest box	France	13	Co_23		+			AM921910		AM921864
D. gallinae	ROL1	ROL16	Roller	on bird - nest box	France	13		Tro_15	+	Tro_1	AM903304	AM921910			FN398094	id. FN257872
D. gallinae	ROL2	ROL23	Roller	on bird - nest box	France	13	Co_24				AM903305	AM921911		AM921865
D. gallinae	ROL2	ROL25	Roller	on bird - nest box	France	13		Tro_15	+	Tro_3	AM903305	AM921911			FN398093	id. FN257812
D. gallinae	ROL2	ROL26	Roller	on bird - nest box	France	13	Co_25	Tro_58	+	Tro_15				FN432522	FN257914	FN257915
D. gallinae	ROL09	ROL095	Roller	on bird - nest box	France	13							FN599064, FN599065, FN599066, FN599067	FN599078	xxxxxxxx	xxxxxxxx
D. gallinae	ROL09	ROL096	Roller	on bird - nest box	France	13							FN599068, FN599069, FN599070	FN599079	FN599082	xxxxxxxx
D. gallinae	SB	SB1	Layer hen	amateur layer house	France	69	Co_20	Tro_2	+	Tro_2				AM921858	FN257766	HOM.
D. gallinae	SK	SK081	Layer hen	lab strain (original isolate from a layer farm)	Denmark		Co_11	Tro_3	+	Tro_2				AM921856	FN257861	FN257862
D. gallinae	SK	SK0810	Layer hen	lab strain (original isolate from a layer farm)	Denmark		Co_11	Tro_2	+	Tro_3				id. AM921856	id. FN257781	id. FN257812
D. gallinae	SK	SK0811	Layer hen	lab strain (original isolate from a layer farm)	Denmark		Co_11	Tro_2	+	Tro_2				id. AM921856	id. FN257781	HOM.
D. gallinae	SK	SK0812	Layer hen	lab strain (original isolate from a layer farm)	Denmark		Co_11	Tro_2	+	Tro_1				id. AM921856	id. FN257781	id. FN257872
D. gallinae	SK	SK0813	Layer hen	lab strain (original isolate from a layer farm)	Denmark		Co_11	Tro_1	+	Tro_1				id. AM921856	FN257866	HOM.
D. gallinae	SK	SK0814	Layer hen	lab strain (original isolate from a layer farm)	Denmark		Co_11	Tro_1	+	Tro_1				id. AM921856	id. FN257872	HOM.
D. gallinae	SK	SK0815	Layer hen	lab strain (original isolate from a layer farm)	Denmark		Co_12	Tro_2	+	Tro_2				FN432526	id. FN257781	HOM.
D. gallinae	SK	SK0816	Layer hen	lab strain (original isolate from a layer farm)	Denmark		Co_11	Tro_2	+	Tro_1				id. AM921856	id. FN257781	id. FN257872
D. gallinae	SK	SK0817	Layer hen	lab strain (original isolate from a layer farm)	Denmark		Co_11	Tro_2	+	Tro_2				id. AM921856	id. FN257781	HOM.
D. gallinae	SK	SK0818	Layer hen	lab strain (original isolate from a layer farm)	Denmark		Co_13	Tro_2	+	Tro_2				FN432526	id. FN257781	HOM.
D. gallinae	SK	SK0819	Layer hen	lab strain (original isolate from a layer farm)	Denmark		Co_14	Tro_2	+	Tro_2				FN432527	id. FN257781	HOM.
D. gallinae	SK	SK082	Layer hen	lab strain (original isolate from a layer farm)	Denmark		Co_11	Tro_3	+	Tro_2				id. AM921856	id. FN257812	id. FN257781
D. gallinae	SK	SK0820	Layer hen	lab strain (original isolate from a layer farm)	Denmark		Co_11	Tro_2	+	Tro_2				id. AM921856	id. FN257781	HOM.
D. gallinae	SK	SK0821	Layer hen	lab strain (original isolate from a layer farm)	Denmark		Co_13	Tro_2	+	Tro_2				FN432528	id. FN257781	HOM.
D. gallinae	SK	SK0822	Layer hen	lab strain (original isolate from a layer farm)	Denmark		Co_11	Tro_2	+	Tro_2				id. AM921856	id. FN257781	HOM.
D. gallinae	SK	SK0823	Layer hen	lab strain (original isolate from a layer farm)	Denmark			Tro_1	+	Tro_1					id. FN257872	HOM.
D. gallinae	SK	SK0824	Layer hen	lab strain (original isolate from a layer farm)	Denmark		Co_11	Tro_1	+	Tro_1				id. AM921856	id. FN257872	HOM.
D. gallinae	SK	SK0826	Layer hen	lab strain (original isolate from a layer farm)	Denmark		Co_11							id. AM921856
D. gallinae	SK	SK083	Layer hen	lab strain (original isolate from a layer farm)	Denmark		Co_11	Tro_2	+	Tro_1				id. AM921856	id. FN257781	id. FN257872
D. gallinae	SK	SK084	Layer hen	lab strain (original isolate from a layer farm)	Denmark		Co_11	Tro_2	+	Tro_2				id. AM921856	FN257863	HOM.
D. gallinae	SK	SK085	Layer hen	lab strain (original isolate from a layer farm)	Denmark		Co_11							id. AM921856
D. gallinae	SK	SK086	Layer hen	lab strain (original isolate from a layer farm)	Denmark		Co_11							id. AM921856
D. gallinae	SK	SK087	Layer hen	lab strain (original isolate from a layer farm)	Denmark		Co_11	Tro_2	+	Tro_1				id. AM921856	FN257864	FN257865
D. gallinae	SK	SK088	Layer hen	lab strain (original isolate from a layer farm)	Denmark		Co_11	Tro_2	+	Tro_1				id. AM921856	id. FN257781	id. FN257872
D. gallinae	SK	SK089	Layer hen	lab strain (original isolate from a layer farm)	Denmark		Co_11	Tro_3	+	Tro_2				id. AM921856	id. FN257812	id. FN257781
D. gallinae	SK		Layer hen	lab strain (original isolate from a layer farm)	Denmark						AM903303	AM921887	AM930858	AM921856
D. gallinae	Woodp	Woodp	Great Spotted Woodpecker	on bird - banding activity	France	69	Co_33	Tro_25	+	Tro_25	AM903301	AM921890	AM930862	AM921863	FN398096	HOM.
D. hirsutus	ADhirs	ADhirs			USA		Co_Dhirsutus	Tro_Dhirsutus	+	Tro_Dhirsutus	AM931077	AM921912	FN599092	AM921878	FM897371	HOM.
D. hirundinis	ADhirun		Tree swallow	nestbox	USA						AM931076	AM921913	FN599091	AM921881
D. hirundinis	CB4	CB4d	Barn swallow	bird nest - from barn	France	1	Co_38	Tro_44	+	Tro_44				FM208727	FN257838	HOM.
D. hirundinis	CB5	CB5c	Barn swallow	bird nest - from barn	France	1	Co_38	Tro_44	+	Tro_44				FM208728	FN257839	HOM.
D. hirundinis	CB5	CB5d	Barn swallow	bird nest - from barn	France	1	Co_38	Tro_44	+	Tro_44				id. FM208728	FN257850	HOM.
D. hirundinis	CB5	CB5e	Barn swallow	bird nest - from barn	France	1	Co_38	Tro_44	+	Tro_44				id. FM208728	FN257840	HOM.
D. hirundinis	CHOV	CHOV1	Barn swallow	bird nest - from barn	France	72	Co_38	Tro_44	+	Tro_44	AM943019			FM179369	FN257841	HOM.
D. hirundinis	CHOV	CHOV2	Barn swallow	bird nest - from barn	France	72	Co_38	Tro_44	+	Tro_44	AM943019			id. FM179369	FN257842	HOM.
D. hirundinis	HR		Barn swallow	bird nest - from barn	France	69					AM903300	AM921888	AM930859	AM921872
D. hirundinis	HIR	HIR1A	Barn swallow	bird nest - from barn	France	85	Co_39	Tro_44	+	Tro_44	FM179379			FM179366	FN257843	HOM.
D. hirundinis	HIR	HIR1B	Barn swallow	bird nest - from barn	France	85	Co_39	Tro_44	+	Tro_44	FM179379			id. FM179366	FN257844	HOM.
D. hirundinis	HIR	HIR6a	Barn swallow	bird nest - from barn	France	85	Co_38	Tro_44	+	Tro_44				FN432529	FN257845	HOM.
D. hirundinis	HIR	HIR6b	Barn swallow	bird nest - from barn	France	85	Co_39	Tro_44	+	Tro_44				FN432530	FN257849	HOM.
D. hirundinis	HIR	HIR6c	Barn swallow	bird nest - from barn	France	85	Co_39	Tro_44	+	Tro_44				FN432531	FN257848	HOM.
D. hirundinis	LB18c	LB18c	Barn swallow	bird nest - from barn		18		Tro_44	+	Tro_44					id. FN257846	HOM.
D. hirundinis	OC	OC5	Barn swallow	bird nest - building roof	France	38	Co_38	Tro_44	+	Tro_44	AM903312	AM921889	AM930860	AM921862	FN257846	HOM.
D. hirundinis	OC	OC6	Barn swallow	bird nest - building roof	France	38	Co_38	Tro_44	+	Tro_44	AM903312	AM921889	AM930860	id. AM921862	FN257847	HOM.
D. hirundinis	PARATR	PARATR8	Tit	layer farm	USA		Co_37	Tro_43	+	Tro_42				FM208746	FN257851	FN257852
D. hirundinis	TB08	TB082	Barn swallow	bird nest - from barn	France	69	Co_38							FN432532
D. hirundinis	TB08	TB083	Barn swallow	bird nest - from barn	France	69	Co_38							FN432533
D. hirundinis	TB08	TB084	Barn swallow	bird nest - from barn	France	69	Co_38	Tro_44	+	Tro_44				FN432534	FN257879	HOM.
D. hirundinis	TB08	TB085	Barn swallow	bird nest - from barn	France	69	Co_38	Tro_44	+	Tro_44				FN432535	FN257880	HOM.
D. hirundinis	TB08	TB085e	Barn swallow	bird nest - from barn	France	69	Co_56	Tro_44	+	Tro_44				FN432536	id. FN257846	HOM.
D. hirundinis	TB08	TB085g	Barn swallow	bird nest - from barn	France	69	Co_56	Tro_44	+	Tro_44				FN432537	id. FN257846	HOM.
D. hirundinis	TROAED	TROAED2	Troglodyte	bird nest	USA		Co_37	Tro_42	+	Tro_42				FM208747	FN257853	HOM.
D. longipes	EN	ENVL083a	Tit	bird nest - nest box	France	69	Co_40	Tro_48	+	Tro_48	FM179377	FM17937		FM179365	FN257854	HOM.
D. longipes	EN	ENVL083b	Tit	bird nest - nest box	France	69	Co_40	Tro_47	+	Tro_47	FM179377	FM17937		id. FM179365	FN257855	HOM.
D. longipes	EN	ENVL088a	Tit	bird nest - nest box	France	69	Co_41	Tro_46	+	Tro_46				FM208743	FN257856	HOM.
D. longipes	EN	ENVL088b	Tit	bird nest - nest box	France	69	Co_41	Tro_45	+	Tro_45				id. FM208743	FN257857	HOM.
D. longipes	PAS	JBO108a	Sparrow	bird nest - nest box	France	13	Co_42	Tro_41	+	Tro_41	AM903310	AM921904	AM930873	FN432538	FN257837	HOM.
D. longipes	PAS	JBO495	Sparrow	bird nest - nest box	France	13	Co_42	Tro_41	+	Tro_41	AM903310	AM921904	AM930873	AM921869	FN257858	HOM.
D. longipes	PAS	JBO49DL2	Sparrow	bird nest - nest box	France	13	Co_42	Tro_41	+	Tro_41			AM930873	id. AM921869	FM897376	HOM.
D. longipes	PAS	JBO49DL3	Sparrow	bird nest - nest box	France	13	Co_42	Tro_41	+	Tro_41				id. AM921869	FN257860	HOM.
D. quintus	ADqui	ADqui			USA		Co_Dquintus							AM921882
O. sylviarum	JBO_Os	JBO100b	Tit	bird nest - nest box	France	13					FN646500, FN646505			FN432541	FN599088	HOM.
O. sylviarum	JBO_Os	JBO10	Tit	bird nest - nest box	France	13						FN599080	AM930881	FN599074	id. FN599088	HOM.
O. sylviarum	JBO_Os	JBO74	Tit	bird nest - nest box	France	13								FN646529
O. sylviarum	JBO_Os	JBO78	Tit	bird nest - nest box	France	13								FN646530
O. sylviarum	PM		Tit	bird nest - nest box	France	69						FN646506	id. AM930881
O. sylviarum	OSBM	OSBMc	Layer hen	Layer farm	USA							FN599081		FN599077	FN599089	HOM.
O. sylviarum	FS5	FS5a	Montagu's Harrier	Bird nest – wheat field	France	85					FN646501, FN646504		FN646532	FN432544	FN599087	HOM.
O. sylviarum	FS5	FS5b	Montagu's Harrier	Bird nest – wheat field	France	85					FN646501, FN646504		FN599073	FN432545	FN599086	HOM.
O. sylviarum	FS5	FS5c	Montagu's Harrier	Bird nest – wheat field	France	85								FN646531
O. sylviarum	FS6	FS6a	Montagu's Harrier	Bird nest – wheat field	France	85					FN646502, FN646503		FN599071, FN599072	FN432547	FN599084	HOM.
O. sylviarum	FS6	FS6b	Montagu's Harrier	Bird nest – wheat field	France	85					FN646502, FN646503		xxxxxxxx	FN432548	FN599085	HOM.
O. bacoti	Ob	Ob		lab strain	France	75	Co_Obacoti	Tro_Obacoti	+	Tro_Obacoti	AM903318	AM921905		FM179677	FN257767	HOM.
T. pyri	T_pyri	T_pyri		lab strain	France	34	Co_Tpyri	Tro_Tpyri	+	Tro_Tpyri	FM179376	FM179373		FM179364	FN649761	HOM.
